# F-Actin Bending Facilitates Net Actomyosin Contraction By Inhibiting Expansion With Plus-End-Located Myosin Motors

Alexander K. Y. Tam<sup>\*1</sup>, Alex Mogilner<sup>2</sup>, and Dietmar B. Oelz<sup>1</sup>

<sup>1</sup>School of Mathematics and Physics, The University of Queensland, St Lucia, Queensland 4072, Australia.

<sup>2</sup>Courant Institute of Mathematical Sciences, New York University, New York, NY, USA

August 20, 2021

---

## Abstract

We investigate whether a microscopic system of two semi-flexible actin filaments with an attached myosin motor can facilitate contraction. Based on energy minimisation, we derive and analyse a partial differential equation model for a two-filament-motor structure embedded within a dense, two-dimensional network. Our method enables calculation of the plane stress tensor, providing a measure for contractility. After deriving the model, we use a combination of asymptotic analysis and numerical solutions to show how F-actin bending facilitates net contraction as a myosin motor traverses two symmetric filaments. Myosin motors close to the minus-ends facilitate contraction, whereas motors close to the plus-ends facilitate expansion. The leading-order solution for rigid filaments exhibits polarity-reversal symmetry, such that the contractile and expansive components balance to zero. Surprisingly, after introducing bending the first-order correction to stress indicates expansion. However, numerical solutions show that filament bending induces a geometric asymmetry that brings the filaments closer to parallel as a myosin motor approaches their plus-ends. This decreases the effective spring force opposing motion of the motor, enabling it to move faster close to filament plus-ends. This reduces the contribution of expansive stress, giving rise to net contraction. Further numerical solutions confirm that this applies beyond the small bending regime considered in the asymptotic analysis. Our findings confirm that filament bending gives rise to microscopic-scale actomyosin contraction, and provides a possible explanation for network-scale contraction.

**Keywords:** actomyosin, curve-straightening flow, energy functional, gradient flow, stress tensor, asymptotic analysis

---

## 1 Introduction

2 The mechanics of actin filament and myosin motor proteins in the cell cortex underpins  
3 movement (Yamada and Sixt 2019) and division (Pollard 2010) of biological cells. Early

---

\*Corresponding author: [alex.tam@uq.edu.au](mailto:alex.tam@uq.edu.au)

4 breakthroughs in understanding actomyosin dynamics occurred in the context of muscle  
5 cells (Gautel 2011). There, actin and myosin form sarcomere structures, in which filaments  
6 are aligned in parallel with minus-ends in the centre and plus-ends pointing outwards.  
7 Relative motion of myosin motors towards filament plus-ends subsequently generates  
8 contraction by pulling filaments inwards. This mechanism is known as sliding filament  
9 theory (Huxley 2004). However, actomyosin networks in the cell cortex are disordered,  
10 with filaments distributed at random. Experiments (Murrell, Oakes, et al. 2015; Pollard  
11 and O’Shaughnessy 2019) and simulations (Tam, Mogilner, and Oelz 2021; Ennomani et al.  
12 2016) have shown that disordered actomyosin networks also contract (Chalut and Paluch  
13 2016). Sliding filament theory predicts that random networks would produce expansion or  
14 contraction with equal probability, and thus cannot explain this contraction. Consequently,  
15 the origin of contraction in disordered networks remains an active field of research. A  
16 pertinent question is whether asymmetry on the microscopic scale (Lenz 2014; Komianos  
17 and Papoian 2018) can explain network-scale contraction, or whether long-range effects  
18 amplify contractile stress (Ronceray, Broedersz, and Lenz 2016). A microscopic asymmetry  
19 would require additional mechanics to those predicted by sliding filament theory.

20 Filament bending flexibility is commonly-hypothesised as a source of asymmetry that  
21 might explain contraction of disordered actomyosin networks (Murrell and Gardel 2012;  
22 De La Cruz and Gardel 2015; du Roure et al. 2019; Head, Levine, and MacKintosh  
23 2003; Tam, Mogilner, and Oelz 2021). Actin filaments are semi-flexible (Stachowiak et al.  
24 2014; Belmonte, Leptin, and Nédélec 2017), such that they undergo small but significant  
25 bending (Broedersz and Mackintosh 2014; Murrell and Gardel 2012). This is not relevant  
26 in sarcomeres with parallel arrays of filaments, but is for two and three-dimensional  
27 networks with random filament orientations. Many previous experimental and theoretical  
28 studies invoke a filament buckling mechanism, whereby filaments can sustain longitudinal  
29 tension, but buckle under longitudinal compression (Bidone et al. 2017; Belmonte, Leptin,  
30 and Nédélec 2017; Cheffings, Burroughs, and Balasubramanian 2016; du Roure et al.  
31 2019; Freedman, Banerjee, et al. 2017; Freedman, Hocky, et al. 2018; Lenz 2020; Murrell  
32 and Gardel 2012; Ronceray, Broedersz, and Lenz 2016; Soares e Silva et al. 2011; Yu  
33 et al. 2018). This has been shown to generate network-scale bias to contraction over  
34 expansion (Belmonte, Leptin, and Nédélec 2017). Other studies have considered a related  
35 filament bending mechanism (Lenz 2014; Tam, Mogilner, and Oelz 2021; Head, Levine, and  
36 MacKintosh 2003; Popov, Komianos, and Papoian 2016; Kim 2015; Letort et al. 2015) as a  
37 source of force asymmetry. This involves applying forces that pluck filaments transversely,  
38 as opposed to the longitudinal forces involved with buckling. Lenz (2014) showed that  
39 filament bending produces forces that exceed those involved with longitudinal buckling,  
40 and Tam, Mogilner, and Oelz (2021) showed that this mechanism facilitates network-scale  
41 contraction.

42 An interesting question is whether the force asymmetry provided by bending or buckling

43 applies at the microscopic scale. De La Cruz and Gardel (2015) state that compression,  
44 stretching, and bending forces are relevant on the small scale. In contrast, Ronceray,  
45 Broedersz, and Lenz (2016) state that buckling facilitates network-scale contraction by  
46 enabling transmission of contractile force, and inhibiting expansive. This phenomenon is  
47 highly nonlinear, and does not require microscopic asymmetry. One approach to understand  
48 microscopic filament dynamics is to model a single filament as a worm-like chain (Broedersz  
49 and Mackintosh 2014; Lenz et al. 2012). Broedersz and Mackintosh (2014) used this  
50 approach to identify an asymmetry under extension and compression. Other authors  
51 have considered structures consisting of two-filaments and an attached motor (Lenz 2014;  
52 Belmonte, Leptin, and Nédélec 2017; Hiraiwa and Salbreux 2016; Komianos and Papoian  
53 2018). Hiraiwa and Salbreux (2016) and Komianos and Papoian (2018) considered the  
54 effect of motors and cross-linkers on forces generated by rigid filament pairs. However,  
55 Lenz (2014) reported that disordered networks of rigid filaments with polarity-reversal  
56 symmetry (*i.e.* any configuration of filaments is equally likely as the same configuration  
57 with minus and plus-ends reversed) generate zero net contraction. Belmonte, Leptin,  
58 and Nédélec (2017) developed a statistical method to predict network-scale contraction  
59 by summing the contributions from two-filament structures, assuming filaments buckle  
60 under compression. An important advance was provided by Lenz (2014), who compared  
61 symmetry-breaking mechanisms for two filaments, and found filament bending gives rise  
62 to contraction on the microscopic scale. They subsequently showed bending to be the  
63 dominant mechanism of contraction for experimentally-feasible parameters. Our objective  
64 is to investigate the microscopic origin of bending-induced contraction in detail.

65 Semi-flexible filament evolution is an example of a curve-straightening flow. Mathemat-  
66 ically, this refers to deformation of curves in  $\mathbb{R}^2$  by decreasing their total squared curvature.  
67 Curve-straightening is relevant to actomyosin, because filaments evolve to minimise their  
68 bending energy, which is proportional to total curvature. Curve-straightening problems  
69 have been investigated extensively since the 1980s, mostly in the context of single curves  
70 (Langer and Singer 1984; Langer and Singer 1987; Linnér 1989; Linnér 2003). Wen  
71 (1993) and Wen (1995) then used the indicatrix representation and  $L^2$ -gradient flow of  
72 the squared curvature functional to derive a fourth-order, semilinear parabolic partial  
73 differential equation (PDE). Oelz (2011) extended these methods to open curves. However,  
74 current theoretical analysis of curve-straightening flows is largely limited to single curves.  
75 In this work, we extend these methods to pairs of curves interacting with a molecular  
76 motor, and derive and analyse the associated partial differential equations.

77 The objectives of this paper are two-fold. First, we derive a PDE model for two  
78 semi-flexible filaments with a myosin motor attached at their intersection. Through this  
79 derivation, we describe how to obtain an explicit formula for the network stress tensor.  
80 We then use this model to investigate in detail how this two-filament structure facilitates  
81 microscopic-scale contraction. Since these dynamics are more complex than the single-

82 curve straightening problem, we use a combination of asymptotic analysis and numerical  
83 solutions to achieve this. We apply the model to pairs of symmetric filaments with a motor  
84 initially attached to the minus-ends, and solve until the motor reaches the plus-ends and  
85 detaches. From this analysis, we propose a mechanism based neither on filament buckling,  
86 nor intrinsic force asymmetry where bending generates contraction. Instead, we find that  
87 filament semi-flexibility creates a geometric asymmetry that inhibits expansion. Two rigid  
88 filaments exhibit polarity-reversal symmetry, such that the contraction associated with  
89 a minus-end-located motor balances with expansion associated with a plus-end-located  
90 motor. Introducing filament bending breaks this symmetry, and brings the filaments closer  
91 to parallel as the motor approaches the plus-ends. This decreases the resistance to motion  
92 generated by the spring force through the motor, enabling it to move faster close to the  
93 plus-ends. This asymmetry inhibits expansive stress, and gives rise to net contraction on  
94 the microscopic scale.

## 95 2 Mathematical Model

96 We develop a mathematical model for a myosin motor attached to two overlapping actin  
97 filaments, as illustrated in Figure 2.1a. We represent filaments as open curves in  $\mathbb{R}^2$ , and  
98 denote their positions by  $z_i(s(t), t) = (x_i(s(t), t), y_i(s(t), t))$ , for  $i = 1, 2$ . Here,  $t$  is time  
99 and  $s \in [0, L_i]$  is the arc length parameter, where  $L_i$  is the length of the  $i$ -th filament.  
100 Since actin filaments are polarised, we adopt the convention that  $s = 0$  corresponds  
101 to the filament minus-end, and  $s = L_i$  corresponds to the plus-end. We represent the  
102 myosin motor as a point object existing at the intersection between the two filaments.  
103 We track its position by introducing the variables  $m_i(t) \in [0, L_i]$ , such that  $s = m_i$  is  
104 the position of the motor head attached to the  $i$ -th filament. We assume that no other  
105 proteins, for example cross-linkers, are present. The two-filament-motor system is located  
106 within a parallelogram-shaped domain, the adjacent sides of which are given by the vectors  
107  $\mathbf{L}_x = (L_{xx}, L_{xy})^T$ , and  $\mathbf{L}_y = (L_{yx}, L_{yy})$ . The vectors  $\mathbf{F}_x = (F_{xx}, F_{xy})$  and  $\mathbf{F}_y = (F_{yx}, F_{yy})$ ,  
108 shown in Figure 2.1a, are the normal and shear force components acting on the domain  
109 boundaries. These can be obtained as part of the solution, and we will describe the method  
110 to compute these later.

We express the mathematical model for the filament and motor mechanics as a system of force-balance equations. In abstract terms, we write

$$F_{a,\text{drag}} - \delta E_{a,\text{bend}} - \delta E_{a,\text{stretch}} - \delta E_{m,\text{stretch}} + F_{m,a} = \mathbf{0}. \quad (2.1)$$

111 The first three terms in (2.1) describe the drag, bending, and longitudinal stretching  
112 forces respectively on actin filaments. The fourth term represents longitudinal stretching  
113 along the myosin motor, and the final term describes forces between filaments and motors.

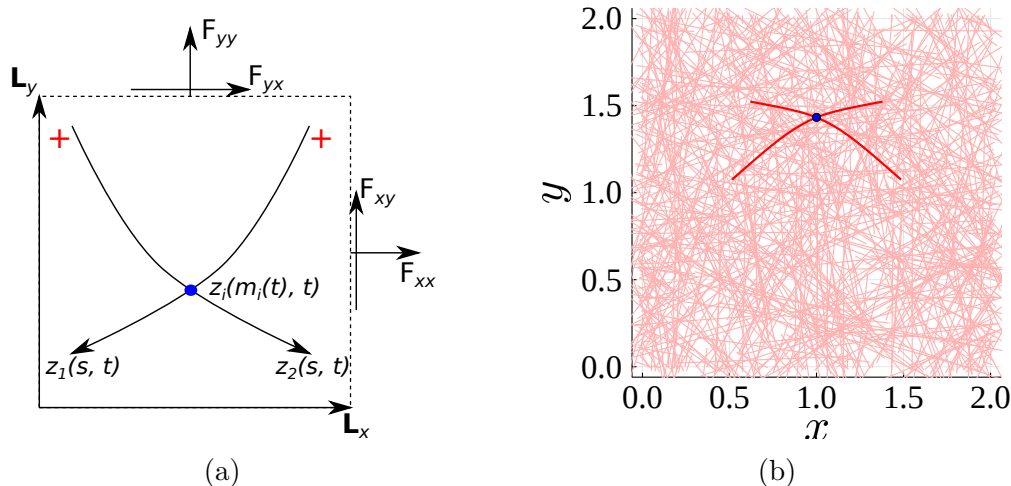

Figure 2.1: (a) Schematic representation of a two-filament-motor system. The filaments are the curves  $z_1$  and  $z_2$ , and arrow heads represent filament minus (pointed) ends. Myosin motor proteins are represented by blue dots, and initially appear at the intersection between the two filaments. (b) A two-filament-motor structure immersed in a dense background network.

114 We represent bending and stretching forces as the variation of potential energy, where  
 115 terms involving  $\delta$  denote variations. We conceptualise drag as the combined effects of  
 116 friction between the filaments and the cytoplasm, and protein friction (Tam, Mogilner,  
 117 and Oelz 2021; McFadden et al. 2017; Bormuth et al. 2009; Tawada and Sekimoto 1991)  
 118 acting at intersections between the two filaments and filaments in a background network.  
 119 Figure 2.1b illustrates this scenario. In the limit of infinite background network density,  
 120 protein friction acts uniformly along the two filaments in consideration, and represents the  
 121 dominant contribution to overall drag.

## 122 2.1 Energy Minimisation and Calculation of Stress

To derive and simulate the model, we formulate the force-balance equations (2.1) as an energy minimisation problem. This involves constructing a time-discrete functional that sums the contribution of each force term,

$$E[z_1, z_2, m_1, m_2] := E_{a,\text{drag}} + E_{a,\text{bend}} + E_{a,\text{stretch}} + E_{m,\text{stretch}} + E_{m,a}. \quad (2.2)$$

123 In (2.2),  $E_{a,\text{bend}}$ ,  $E_{a,\text{stretch}}$ , and  $E_{m,\text{stretch}}$  are the potential energies associated with filament  
 124 bending, filament stretching, and motor stretching respectively. The terms  $E_{a,\text{drag}}$  and  $E_{m,a}$   
 125 are pseudo-energy terms with variations that correspond to finite-difference approximations  
 126 of  $F_{a,\text{drag}}$  and  $F_{m,a}$ , which cannot be interpreted as variations of potential energy. At each  
 127 time step of the simulation, the filament and motor positions are the minimiser of the  
 128 functional (2.2). We outline each term in (2.2) below.

The first term,  $E_{a,\text{drag}}$ , describes drag friction that opposes filament motion. Drag acts uniformly along the filaments, and could arise from viscous drag between filaments and the cytoplasm, or from protein friction between the filaments and a dense background network. The pseudo-energy term to represent this is

$$E_{a,\text{drag}} = \lambda_a \sum_{i=1}^2 \int_0^{L_i} \frac{|z_i - \mathbf{F}z_i^n|^2}{2\Delta t} ds, \quad (2.3)$$

where  $\lambda_a$  is the filament drag coefficient,  $\Delta t$  is the time step size, and the superscript  $n$  refers to the previous time step, *i.e.*  $z_i^n = z_i(s, t - \Delta t)$ . To account for possible stretching and rotation of the domain over time, we introduce the deformation gradient tensor,

$$\mathbf{F} = \begin{bmatrix} L_{xx}/L_{xx}^n & L_{yx}/L_{yy}^n \\ L_{xy}/L_{xx}^n & L_{yy}/L_{yy}^n \end{bmatrix}, \quad (2.4)$$

129 such that multiplying  $z_i^n$  by  $\mathbf{F}$  ensures that  $z_i$  and  $z_i^n$  are both represented in the current  
130 spatial co-ordinates.

We model bending of semi-flexible actin filaments via the elastic potential energy

$$E_{a,\text{bend}} = \sum_{i=1}^2 \int_0^{L_i} \frac{\kappa_a}{2} |z_i''|^2 ds, \quad (2.5)$$

where  $\kappa_a$  is the flexural rigidity, and primes denote differentiation with respect to arc-length,  $s$ . We assume that  $\kappa_a$  is constant, and the same for both filaments. We obtain a term for filament stretching by assuming that actin filaments are inextensible. To model this, we ensure that  $|z_i'| = 1$  at every point along the filaments using the penalisation term

$$E_{a,\text{stretch}} = \sum_{i=1}^2 \int_0^{L_i} \frac{1}{\delta_a} (|z_i'| - 1)^2 ds, \quad (2.6)$$

131 where  $\delta_a$  is an arbitrarily small parameter that enforces the inextensibility constraints.

The remaining two terms in (2.2) describe how motors contribute to the mechanics. We ensure that motors remain point objects by introducing another penalising potential,

$$E_{m,\text{stretch}} = \frac{1}{\delta_m} |z_1(m_1, t) - z_2(m_2, t)|^2, \quad (2.7)$$

where  $\delta_m$  is an arbitrarily small parameter that penalises deviation from the constraint  $z_1(m_1, t) = z_2(m_2, t)$ . The final term in (2.2) describes interactions between filaments and motors. We assume that motors obey a linear (affine) force-velocity relationship. Subject to zero force, motors move with speed  $V_m$ . As the force through the motor increases, velocity decreases linearly until the motor stops, which occurs at the force  $F_s$ , known as the stall force. The corresponding pseudo-energy term consists of a linear term, and a

quadratic drag-like term for the velocity reduction caused by the force through the motor,

$$E_{m,a} = \sum_{j=1}^2 \left( -F_s m_j + \frac{F_s}{V_m} \frac{(m_j - m_j^n)^2}{2\Delta t} \right). \quad (2.8)$$

132 Minimising the functional (2.2) consisting of (2.3) and (2.5)–(2.8), then provides a time-  
133 implicit numerical method to solve for the filament and motor positions.

Another advantage of energy minimisation is that it enables direct calculation of forces on the domain boundary that must be applied to prevent elongation and shear. These forces sum the contributions of both filaments and the motor, and provide a measure of net contractility. We obtain these forces  $\mathbf{F}_x$  and  $\mathbf{F}_y$  by adding extra terms to the energy functional, and defining

$$E_{\text{total}} := E + \mathbf{F}_x \cdot \mathbf{L}_x + \mathbf{F}_y \cdot \mathbf{L}_y. \quad (2.9)$$

If we impose that  $\mathbf{L}_x$  and  $\mathbf{L}_y$  remain constant, the vectors  $\mathbf{F}_x = -\partial_{\mathbf{L}_x} E$  and  $\mathbf{F}_y = -\partial_{\mathbf{L}_y} E$  represent Lagrange multipliers that enforce the constant domain size and shape constraints. After computing these, we describe the two-dimensional state of stress in the domain using the plane stress tensor,

$$\boldsymbol{\sigma} = \begin{bmatrix} F_{xx}/L_{yy} & F_{xy}/L_{yy} \\ F_{yx}/L_{xx} & F_{yy}/L_{xx} \end{bmatrix}. \quad (2.10)$$

The bulk stress,

$$\sigma = \frac{1}{2} \text{tr}(\boldsymbol{\sigma}), \quad (2.11)$$

134 then provides a measure of the contraction or expansion generated by the two-filament-  
135 motor system. By convention, negative  $\sigma$  indicates contraction, and positive  $\sigma$  indicates  
136 expansion. The quantity  $\sigma$  is invariant to domain rotations, and equal to the average of  
137 the eigenvalues of  $\boldsymbol{\sigma}$ . The associated eigenvectors of  $\boldsymbol{\sigma}$  are the principal stress directions,  
138 which indicate the directions of maximum contraction or expansion.

## 139 2.2 Governing Equations

Formulating the model as an energy minimisation problem enables us to derive PDEs that govern the filament and motor positions. The derivation is based on the following variational principle. It requires that, given known data  $(z_1^n, z_2^n, m_1^n, m_2^n)$  at the discrete point in time  $n$ , the solution at the following point in time minimises the functional (2.2),

$$(z_1^{n+1}, z_2^{n+1}, m_1^{n+1}, m_2^{n+1}) = \text{argmin} E[z_1^n, z_2^n, m_1^n, m_2^n](z_1, z_2, m_1, m_2). \quad (2.12)$$

We obtain the corresponding force-balance equations by setting to zero the functional derivatives of (2.2) with respect to filament and motor positions. Subsequently, we write

$$\delta E [z_1^n, z_2^n, m_1^n, m_2^n] (z_1^{n+1}, z_2^{n+1}, m_1^{n+1}, m_2^{n+1}) \cdot (\delta z_1, \delta z_2, \delta m_1, \delta m_2) = 0, \quad (2.13)$$

where terms involving  $\delta$  denote the variation of the respective quantity. This formulation enables us to write (2.1) in terms of  $z_i$  and  $m_i$ . We obtain the governing equations by evaluating (2.13) and matching coefficients of  $\delta z_1$ ,  $\delta z_2$ ,  $\delta m_1$ , and  $\delta m_2$ . On taking the formal continuum limit  $\Delta t \rightarrow 0$ , for which  $\mathbf{F} \rightarrow \mathbf{I}$  and  $(u - u^n)/\Delta t \rightarrow \dot{u}$ , we obtain the system of PDEs

$$\left\{ \begin{array}{l} \lambda_a z_1 + \kappa_a z_1'''' - (\lambda_1 z_1')' + \mu \frac{z_1 - z_2}{\|z_1 - z_2\|} \delta(s - m_1) = 0, \end{array} \right. \quad (2.14a)$$

$$\left\{ \begin{array}{l} \lambda_a z_2 + \kappa_a z_2'''' - (\lambda_2 z_2')' - \mu \frac{z_1 - z_2}{\|z_1 - z_2\|} \delta(s - m_2) = 0, \end{array} \right. \quad (2.14b)$$

$$\left\{ \begin{array}{l} \dot{m}_1 = V_m \left[ 1 - \frac{\mu}{F_s} \frac{z_1 - z_2}{\|z_1 - z_2\|} \cdot z_1'(m_1, t) \right], \end{array} \right. \quad (2.14c)$$

$$\left\{ \begin{array}{l} \dot{m}_2 = V_m \left[ 1 + \frac{\mu}{F_s} \frac{z_1 - z_2}{\|z_1 - z_2\|} \cdot z_2'(m_2, t) \right], \end{array} \right. \quad (2.14d)$$

where primes denote differentiation with respect to arc length, dots represent time derivatives, and  $\delta(\cdot)$  is the Dirac delta function (not to be confused with variation). These equations (2.14) are a system of continuum force-balance equations for the filament and motor positions. They are formulated in a formal limit where  $\delta_a$  and  $\delta_m$  are small, and the force coefficients  $1/\delta_a$  and  $1/\delta_m$  in the variations of the penalising potentials (2.6) and (2.7) are replaced by the Lagrange multipliers  $\lambda_1$ ,  $\lambda_2$ , and  $\mu$ . Note that the sign of  $z_1 - z_2$  in (2.14) will be absorbed by  $\mu$ . As a consequence, solutions satisfy the constraints

$$\left\{ \begin{array}{l} |z_i'| \equiv 1, \end{array} \right. \quad (2.15a)$$

$$\left\{ \begin{array}{l} z_1(m_1, t) = z_2(m_2, t). \end{array} \right. \quad (2.15b)$$

The equations are subject to the boundary conditions

$$\left\{ \begin{array}{l} z_i''(0, t) = z_i''(L_i, t) = 0, \end{array} \right. \quad (2.16a)$$

$$\left\{ \begin{array}{l} (\kappa_a z_i'''' - \lambda_i z_i')|_{s=0, L_i} = 0. \end{array} \right. \quad (2.16b)$$

140 A detailed derivation of (2.14) and (2.16) is provided in Appendix A.

To obtain an expression for the bulk stress,  $\sigma$ , we differentiate the energy functional (2.9)



with respect to  $\mathbf{L}_x$  and  $\mathbf{L}_y$ . This yields

$$\mathbf{F}_x = \lambda_a \sum_{i=1}^2 \int_0^{L_i} \frac{x_i^n}{L_{xx}^n} \frac{(z_i - \mathbf{F}z_i^n)}{\Delta t} ds, \quad (2.17a)$$

$$\mathbf{F}_y = \lambda_a \sum_{i=1}^2 \int_0^{L_i} \frac{y_i^n}{L_{yy}^n} \frac{(z_i - \mathbf{F}z_i^n)}{\Delta t} ds. \quad (2.17b)$$

Then, applying the formal continuum limit  $\Delta t \rightarrow 0$ ,  $\mathbf{F} \rightarrow \mathbf{I}$ ,  $(u - u^n)/\Delta t \rightarrow \dot{u}$ , and  $z_i^n \rightarrow z_i$ , we obtain

$$\mathbf{F}_x = \lambda_a \sum_{i=1}^2 \int_0^{L_i} \frac{x_i}{L_{xx}} \frac{\partial z_i}{\partial t} ds, \quad (2.18a)$$

$$\mathbf{F}_y = \lambda_a \sum_{i=1}^2 \int_0^{L_i} \frac{y_i}{L_{yy}} \frac{\partial z_i}{\partial t} ds. \quad (2.18b)$$

Evaluating the bulk stress (2.11) then yields

$$\sigma = \lambda_a \sum_{i=1}^2 \int_0^{L_i} \frac{x_i}{L_{xx}} \frac{\partial x_i}{\partial t} + \frac{y_i}{L_{yy}} \frac{\partial y_i}{\partial t} ds = \lambda_a \sum_{i=1}^2 \int_0^{L_i} z_i \cdot \frac{\partial z_i}{\partial t} ds. \quad (2.19)$$

Furthermore, the expressions (2.18) confirm that

$$\begin{aligned} \sigma_{xy} - \sigma_{yx} &= \lambda_a \sum_{i=1}^2 \int_0^{L_i} \frac{x_i}{L_{xx}L_{yy}} \frac{\partial y_i}{\partial t} - \frac{y_i}{L_{xx}L_{yy}} \frac{\partial x_i}{\partial t} ds \\ &= \frac{\lambda_a}{L_{xx}L_{yy}} \sum_{i=1}^2 \int_0^{L_i} \begin{bmatrix} -y_i \\ x_i \end{bmatrix} \cdot \frac{\partial z_i}{\partial t} ds \\ &= \frac{\lambda_a}{L_{xx}L_{yy}} \sum_{i=1}^2 \int_0^{L_i} z_i^\perp \cdot \frac{\partial z_i}{\partial t} ds = 0, \end{aligned} \quad (2.20)$$

141 where  $z_i^\perp$  denotes a vector orthogonal to  $z_i$ , and we obtain the result by substituting (2.14)  
 142 for  $\dot{z}_i$ . The stress tensor (2.10) is thus symmetric, as expected. Thus, the bulk stress  $\sigma$  is  
 143 equal to the average of the eigenvalues of  $\sigma$ .

### 144 2.3 Nondimensionalisation

We nondimensionalise the PDE model (2.14)–(2.16) by introducing the length and time scales

$$\hat{t} = \frac{F_s}{\lambda_a L_a^2} t, \quad \text{and} \quad (\hat{x}, \hat{y}) = \frac{1}{L_a} (x, y), \quad (2.21)$$

where hats represent dimensionless variables, and  $L_a$  is a characteristic filament length. The dimensionless model is then (dropping hats for convenience)

$$\begin{cases} \dot{z}_1 + \kappa^* z_1'''' - (\lambda_1^* z_1')' + \mu^* \frac{z_1 - z_2}{\|z_1 - z_2\|} \delta^*(s - m_1) = 0, & (2.22a) \\ \dot{z}_2 + \kappa^* z_2'''' - (\lambda_2^* z_2')' - \mu^* \frac{z_1 - z_2}{\|z_1 - z_2\|} \delta^*(s - m_2) = 0, & (2.22b) \\ \frac{1}{V_m^*} \dot{m}_1 = 1 - \mu^* \frac{z_1 - z_2}{\|z_1 - z_2\|} \cdot z_1'(m_1, t), & (2.22c) \\ \frac{1}{V_m^*} \dot{m}_2 = 1 + \mu^* \frac{z_1 - z_2}{\|z_1 - z_2\|} \cdot z_2'(m_2, t), & (2.22d) \end{cases}$$

subject to the boundary conditions

$$\begin{cases} z_i''(0, t) = z_i''(L_i^*, t) = 0, & (2.23a) \\ (\kappa^* z_i''' - \lambda_i^* z_i')|_{s=0, L_i^*} = 0, & (2.23b) \end{cases}$$

and the constraints

$$\begin{cases} |z_i'| \equiv 1, & (2.24a) \\ z_1(m_1, t) = z_2(m_2, t), & (2.24b) \end{cases}$$

where  $\delta^*(\hat{x}) = L_a \delta(L_a \hat{x})$  is a scaled Dirac delta function. The dimensionless parameters and forces are

$$\kappa^* = \frac{\kappa}{F_s L_a^2}, \quad \lambda_i^* = \frac{\lambda_i}{F_s}, \quad \mu_i^* = \frac{\mu_i}{F_s}, \quad V_m^* = \frac{V_m \lambda_a L_a}{F_s}, \quad \text{and} \quad L_i^* = \frac{L_i}{L_a}. \quad (2.25)$$

145 In subsequent sections, we consider asymptotic analysis and numerical solutions to the  
146 dimensionless system (2.22) and (2.23).

## 147 2.4 Symmetric Filament–Motor Assemblies

Before proceeding with the analysis, we consider a simplification to (2.22) and (2.23). First, we assume that the two filaments are symmetric about the vertical, that is

$$z_1 = z, \quad z_2 = \begin{bmatrix} -1 & 0 \\ 0 & 1 \end{bmatrix} z, \quad (2.26)$$

and have identical length  $L_1 = L_2 = L_a$ . This symmetry also implies that the relative position of the motor is the same for both filaments,  $m_1 = m_2 = m$ , and that  $\lambda_1^* = \lambda_2^* = \lambda^*$ . To simplify the motor dynamics (2.22c) and (2.22d), we impose  $V_m \rightarrow \infty$ . Finally, we assume that filaments have large flexural rigidity  $\kappa^* = 1/\varepsilon$ , where  $\varepsilon \ll 1$ , and thus undergo small bending. On applying these simplifications, the dimensionless model (2.22) becomes

(dropping asterisks on dimensionless parameters)

$$\begin{cases} \frac{\partial z}{\partial t} + \frac{1}{\varepsilon} z'''' - (\lambda z')' + \mu \begin{pmatrix} 1 \\ 0 \end{pmatrix} \delta(s - m), \end{cases} \quad (2.27a)$$

$$\begin{cases} 0 = 1 - \mu \begin{pmatrix} 1 \\ 0 \end{pmatrix} \cdot z'(m(t), t), \end{cases} \quad (2.27b)$$

subject to the boundary and initial conditions

$$\begin{cases} z''(0, t) = z''(1, t) = 0, \end{cases} \quad (2.28a)$$

$$\begin{cases} \left( \frac{1}{\varepsilon} z''' - \lambda z' \right) \Big|_{s=0,1} = 0, \end{cases} \quad (2.28b)$$

$$\begin{cases} z(s, t = 0) = z_I(s), \end{cases} \quad (2.28c)$$

and the constraints

$$\begin{cases} |z'| = 1, \end{cases} \quad (2.29a)$$

$$\begin{cases} z(m(t), t) = \begin{pmatrix} 0 \\ y(t) \end{pmatrix}. \end{cases} \quad (2.29b)$$

The dimensionless form of the bulk stress (2.19) in the simplified model (2.27) and (2.28) is then

$$\sigma = 2 \int_0^1 \frac{\partial z}{\partial t} \cdot z \, ds = -2 \int_0^1 \frac{1}{\varepsilon} (z'')^2 + \lambda \, ds. \quad (2.30)$$

To obtain a measure of net stress, we integrate  $\sigma$  over the time between motor attachment and detachment. This yields

$$\int_0^T \sigma \, dt = J(T) - J(0), \quad (2.31)$$

where

$$J(t) = \int_0^1 |z(s, t)|^2 \, ds. \quad (2.32)$$

148 The quantity  $J(T) - J(0)$  describes the net, time-aggregated stress that the two filaments  
 149 produce as they evolve. With this in mind, we use a combination of asymptotic analysis  
 150 and numerical solutions to investigate the effect of filament bending on contraction.

### 151 **3 Asymptotic Analysis**

We construct an asymptotic approximation to the solution of the model for the simplified symmetric problem (2.27)–(2.29). To do this, we expand variables in powers of  $\varepsilon$ ,

$$z = z_0 + \varepsilon z_1 + \varepsilon^2 z_2 + \mathcal{O}(\varepsilon^3), \quad (3.1a)$$

$$m = m_0 + \varepsilon m_1 + \varepsilon^2 m_2 + \mathcal{O}(\varepsilon^3), \quad (3.1b)$$

$$\lambda = \lambda_0 + \varepsilon \lambda_1 + \varepsilon^2 \lambda_2 + \mathcal{O}(\varepsilon^3), \quad (3.1c)$$

$$\mu = \mu_0 + \varepsilon \mu_1 + \varepsilon^2 \mu_2 + \mathcal{O}(\varepsilon^3), \quad (3.1d)$$

$$\sigma = \sigma_0 + \varepsilon \sigma_1 + \varepsilon^2 \sigma_2 + \mathcal{O}(\varepsilon^3), \quad (3.1e)$$

$$J = J_0 + \varepsilon J_1 + \varepsilon^2 J_2 + \mathcal{O}(\varepsilon^3), \quad (3.1f)$$

152 as  $\varepsilon \rightarrow 0$ . On substituting these asymptotic series into (2.27)–(2.29), the leading-order  
 153 solution is the evolution of two rigid filaments with infinite resistance to bending. The  
 154 first-order corrections describe how small, non-zero bending affects the dynamics. In  
 155 subsequent subsections, we present the key results and arguments, and give full details of  
 156 the computations in Appendix B.

#### 157 **3.1 Ansatz For Rigid Filaments**

We obtain an ansatz for the leading-order solution for rigid filaments from the  $\mathcal{O}(1/\varepsilon)$  problem. On substituting the asymptotic expansions (3.1) into the simplified model (2.27)–(2.29), at  $\mathcal{O}(1/\varepsilon)$  we obtain

$$z_0'''' = 0, \quad z_0'''|_{s=0,1} = 0, \quad z_0''|_{s=0,1} = 0, \quad |z_0'| = 1. \quad (3.2)$$

The solution to (3.2) for  $z_0$  is a straight filament, whose direction we parameterise by the filament angle,  $\theta/2$ , measured from the positive vertical axis (see Figure 3.1) writing

$$z_0' = \begin{bmatrix} \sin(\theta/2) \\ \cos(\theta/2) \end{bmatrix}. \quad (3.3)$$

Note that for the orthogonal direction we use the notation

$$z_0'^{\perp} = \begin{bmatrix} -\cos(\theta/2) \\ \sin(\theta/2) \end{bmatrix}, \quad (3.4)$$

where the symbol  $^\perp$  denotes the rotation to the left by  $\pi/2$ . A suitable ansatz for the position of a rigid filament solution satisfying the constraint (2.29b) is then

$$z_0 = \begin{pmatrix} 0 \\ y_0 \end{pmatrix} + z'_0 (s - m_0), \quad (3.5)$$

158 where the leading-order motor relative position,  $m_0$ , and leading-order vertical position  
 159 of the intersection,  $y_0$ , complete the parameterisation. This situation is illustrated in  
 Figure 3.1.

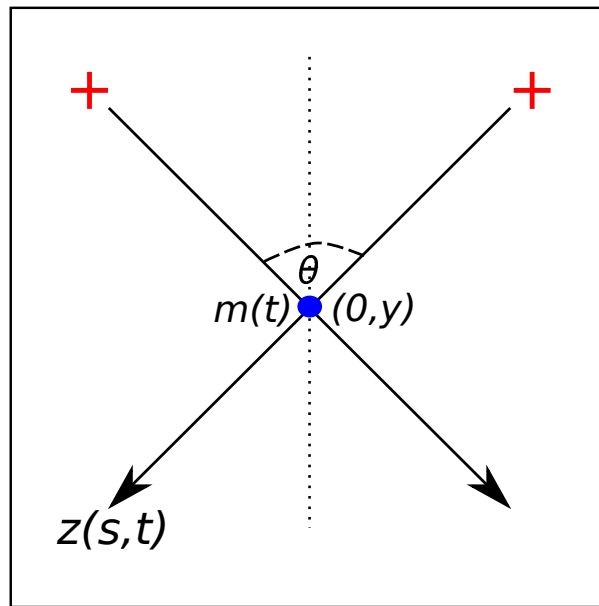

Figure 3.1: Schematic of the simplified two-filament-motor system with two rigid, symmetric actin filaments. The myosin motor has relative position  $m(t)$ , and physical position  $(0, y(t))$ . The two filaments are symmetric about the dashed vertical line, which is the positive  $y$ -axis. The angle between the filaments is  $\theta$ , such that the angle between a filament and the  $y$ -axis is  $\theta/2$ .

160

## 161 3.2 Leading-Order Solution

To obtain the leading-order solution, we consider the  $\mathcal{O}(1)$  problem

$$\left\{ \begin{array}{l} \frac{\partial z_0}{\partial t} + z_1'''' - (\lambda_0 z_0')' + \mu_0 \begin{pmatrix} 1 \\ 0 \end{pmatrix} \delta(s - m_0) = 0, \end{array} \right. \quad (3.6a)$$

$$0 = 1 - \mu_0 \sin\left(\frac{\theta}{2}\right), \quad (3.6b)$$

$$z_1''' - \lambda_0 z_0'|_{s=0,1} = 0, \quad (3.6c)$$

$$z_0(m_0(t), t) = \begin{pmatrix} 0 \\ y_0(t) \end{pmatrix}, \quad (3.6d)$$

$$z_0' \cdot z_1' = 0. \quad (3.6e)$$

To proceed, we use the orthogonality condition (3.6e) to infer the ansatz

$$z_1'(s, t) = h'(s, t)z_0'^{\perp}, \quad (3.7)$$

where  $h(s, t)$  is an arbitrary scalar function. Substituting (3.5) and (3.7) into (3.6a) enables us to solve for the leading-order quantities

$$\mu_0 = \frac{1}{\sin(\theta/2)}, \quad \lambda_0 = H(s - m_0) - s, \quad \text{and} \quad \sigma_0 = 2\nu_0, \quad (3.8)$$

where  $H$  is the Heaviside step function, and  $\nu_0 = m_0 - 1/2$ . Filament evolution then satisfies the ordinary differential equations

$$\frac{dS}{dt} = -24\nu_0(1 - S), \quad (3.9a)$$

$$S \frac{d\nu_0}{dt} = 1 + 12\nu_0^2(1 - S), \quad (3.9b)$$

162 where  $S = \sin^2(\theta/2)$ . Since  $z_0$  is written in terms of the angle  $\theta$  only, the system (3.9)  
 163 determines  $z_0$ , and since  $h'$  is known, we subsequently obtain  $z_1$ . Full details on this  
 164 calculation are available in Appendix B.

An important property of the system (3.9) is that it is invariant under a change of variables which reverses the direction of time. If we introduce the reversed-time  $\tilde{t} = T - t$  for an arbitrary constant  $T$ , we have  $\tilde{\nu}_0(\tilde{t}) = -\nu_0(T - \tilde{t})$  and  $\tilde{\theta}(\tilde{t}) = \theta(T - \tilde{t})$  (*i.e.*  $\tilde{S} = S$ ). Consequently, if the motor is initially positioned at the pointed ends ( $\nu_0(0) = -1/2$ ), and

$T$  denotes the time it reaches the barbed ends, then the time-aggregated stress vanishes,

$$\begin{aligned} J(T) - J(0) &= \int_0^{T/2} \sigma(t) dt + \int_{T/2}^T \sigma(t) dt, \\ &= \int_0^{T/2} 2\nu_0(t) dt + \int_0^{T/2} 2\nu_0(T - \tilde{t}) d\tilde{t} \\ &= \int_0^{T/2} 2\nu_0 dt - \int_0^{T/2} 2\tilde{\nu}_0 d\tilde{t} = 0. \end{aligned} \quad (3.10)$$

165 This is because the equations and initial conditions satisfied by  $\nu_0$ ,  $\theta$ , and  $\tilde{\nu}_0$ ,  $\tilde{\theta}$  both  
 166 coincide, and we have that  $\nu_0(\hat{t}) = \tilde{\nu}_0(\hat{t})$  for all  $\hat{t} \in [0, T]$  (see also numerical result shown  
 167 in Figure 4.1c). These results agree with the previously reported results (Dasanayake,  
 168 Michalski, and Carlsson 2011; Lenz 2014) that rigid filaments with polarity-reversal  
 169 symmetry produce zero net stress.

### 170 3.3 First-Order Corrections

The higher-order correction terms,  $z_1$ ,  $\sigma_1$  and  $J_1$ , elucidate the effect of small, non-zero bending on filament evolution and stress. To solve for these terms, we substitute the asymptotic expansions (3.1) into (2.30) and (2.31) to obtain

$$\sigma = -2 \int_0^1 \lambda_0 ds - 2\varepsilon \int_0^1 (|z_1''|^2 + \lambda_1) ds + \mathcal{O}(\varepsilon^2), \quad (3.11a)$$

$$J = \int_0^1 |z_0|^2 ds + 2\varepsilon \int_0^1 z_0 \cdot z_1 ds + \mathcal{O}(\varepsilon^2). \quad (3.11b)$$

Matching coefficients of  $\varepsilon$  then yields

$$\sigma_1 = -2 \int_0^1 (|z_1''|^2 + \lambda_1) ds, \quad J_1 = 2 \int_0^1 z_0 \cdot z_1 ds. \quad (3.12)$$

In addition, we use the PDE (3.6a) and the ansatz (3.7) to obtain an explicit expression for the curvature of  $z_1$ ,

$$h'' = -\cot\left(\frac{\theta}{2}\right) \left[ (m_0 - s)H(s - m_0) + s^2(m_0(2s - 3) - s + 2) \right]. \quad (3.13)$$

Since the first-order correction to stress,  $\sigma_1$ , involves the currently unknown  $\lambda_1$ , progress requires consideration of the  $\mathcal{O}(\varepsilon)$  problem, which is

$$\left\{ \begin{array}{l} \frac{\partial z_1}{\partial t} + z_2'''' - (\lambda_0 z_1' + \lambda_1 z_0')' + \mu_1 \begin{pmatrix} 1 \\ 0 \end{pmatrix} \delta(s - m_0) - \mu_0 \begin{pmatrix} 1 \\ 0 \end{pmatrix} \delta'(s - m_0) m_1 = 0, \\ 0 = - \begin{pmatrix} 1 \\ 0 \end{pmatrix} (\mu_1 z_0'(m_0(t), t) + \mu_0 z_1'(m_0(t), t)), \\ z_2''' - \lambda_0 z_1' - \lambda_1 z_0'|_{s=0,1} = 0, \\ z_2''|_{s=0,1} = 0, \\ z_1(m_0(t), t) + z_0'(m_1(t), t) = \begin{pmatrix} 0 \\ y_1(t) \end{pmatrix}, \\ |z_1'|^2 + 2z_0' \cdot z_2' = 0. \end{array} \right. \quad \begin{array}{l} (3.14a) \\ (3.14b) \\ (3.14c) \\ (3.14d) \\ (3.14e) \\ (3.14f) \end{array}$$

Obtaining the solution to (3.14) involves an intricate calculation based on the ansatz

$$z_1 = \begin{pmatrix} 0 \\ y_1(t) \end{pmatrix} - z_0'(t)m_1 + z_0'^{\perp} \left[ A(t)(s - m_0) + \int_{m_0}^s \tilde{h}'(s, t) ds \right], \quad (3.15)$$

which reflects (3.14e) and (3.7). This gives rise to a system of equations for the degrees of freedom  $A(t)$ ,  $y_1(t)$ , and  $m_1(t)$ . We provide full details on the calculation to obtain this in Appendix B. A key result is the stress correction term,

$$\sigma_1 = -2 \int_0^1 |h''|^2 ds - 2 \left[ A + \tilde{h}'(m_0, t) \right] \cot\left(\frac{\theta}{2}\right) \left(\frac{1}{2} - m_0\right) + 2m_1, \quad (3.16)$$

where  $\tilde{h}'(m_0, t)$  is given by

$$\tilde{h}'(m_0, t) = -\frac{1}{12} m_0^3 (6m_0^2 - 15m_0 + 8) \cot\left(\frac{\theta}{2}\right). \quad (3.17)$$

171 Similar to the system (3.9), we can obtain a system of differential equations to solve for  
 172  $A(t)$ ,  $y_1(t)$ , and  $m_1(t)$ . Since  $h''$  and  $\tilde{h}'$  are in terms of the leading-order degrees of freedom  
 173  $\theta$  and  $m_0$ , we can subsequently compute  $\sigma_1$ . However, the ODEs for  $A(t)$ ,  $y_1(t)$ , and  $m_1(t)$   
 174 have no exact solution. Therefore, we continue our investigation using numerical solutions.

## 175 4 Numerical Solutions

176 We compute numerical solutions to the simplified system (2.27) in JULIA, by constructing a  
 177 dimensionless version of the functional (2.2), and using `Optim.jl` (Mogensen and Risbeth  
 178 2018) to obtain the minimiser at each time step. This is equivalent to a time-implicit



179 numerical method for solving (2.22). We represent filaments as 50 equal-length line  
180 segments joined at nodes, about which segments can rotate. Each filament has total length  
181  $1\ \mu\text{m}$  (Kamasaki, Osumi, and Mabuchi 2007), and we solve the model using the time  
182 step size  $\Delta t = 0.001$ . We perform the minimisation using the limited-memory Broyden–  
183 Fletcher–Goldfarb–Shanno (LBFGS) method and incorporate automatic differentiation  
184 (`ForwardDiff.jl`) to compute the gradient of the energy (2.2).

## 185 4.1 Comparison With Asymptotic Analysis

186 We begin by computing numerical solutions for two symmetric filaments with  $m(0) = 0$ ,  
187 and  $\theta(0) = \pi/2$ . Like the asymptotic analysis, we assume these filaments are initially rigid,  
188  $V_m \rightarrow \infty$ , and solve until the motor reaches the plus-end and detaches. First, we compute  
189 a solution for two rigid ( $\varepsilon = 1 \times 10^{-5}$ ) filaments, to validate the leading-order bulk stress  
190  $\sigma_0 = 2\nu_0$ , and the solution to (3.9) which governs  $z_0$ . As Figures 4.1a and 4.1b show,  
191 for both of these we obtain agreement between the numerical solution and leading-order  
192 solution. Furthermore, Figure 4.1c illustrates the result from (3.10), namely that zero net  
193 stress is generated when a motor traverses two rigid filaments from the minus to plus-ends,  
194 *i.e.*  $J_0(T) = J_0(0) = 0$ , where  $T = 0.627$  is the time at which the motor reaches the plus  
195 end.

Next, we solve the model with  $\varepsilon = 0.01$  to validate the formulae for  $h''$  and  $\sigma_1$ , (3.13)  
and (3.16) respectively. The dynamics of the two filaments and motor are illustrated in  
Figure 4.2. As part of the solution, we compute  $h''$  using the asymptotic formula (3.13) and  
numerical values of  $\theta$  and  $m$ , and compare this with the numerical value for the curvature,

$$h'' = \frac{1}{\varepsilon} (z_0'^{\perp} \cdot z_0''). \quad (4.1)$$

196 This comparison is shown in Figure 4.3. At each time step, we obtain agreement between  
197 the numerical and asymptotic results. The curvature formula (3.13) also reveals the shape  
198 that the two filaments adopt as they evolve (the qualitative pattern is easier to see in  
199 Figure 4.6). Initially, the filaments adopt a convex shape, as the positive curvature in  
200 Figure 4.3a shows. As the motor moves and pulls the filaments inwards, their shape  
201 changes to concave, as Figures 4.3c and 4.3d show. When the motor approaches the  
202 plus-end, the filaments return to a convex shape. The asymptotic result for  $h''$  remains  
203 accurate for up to  $\varepsilon \sim \mathcal{O}(1)$ , before breaking down for  $\varepsilon \sim \mathcal{O}(10)$ .

204 We also use the numerical solution with  $\varepsilon = 0.01$  to validate the formula for  $\sigma_1$ , the  
205 first-order correction to bulk stress. At each time step, we compute the stress  $\sigma$ , and  
206 compare with the stress in a simulation with  $\varepsilon = 1 \times 10^{-4}$ , which we consider to be  $\sigma_0$  for  
207 rigid filaments. We then approximate the first-order correction as  $\sigma_1 \approx (\sigma - \sigma_0)/\varepsilon$ , and  
208 present results in Figure 4.4a. For most values of  $t$ , it holds that  $\sigma_1 > 0$ . In particular,  
209 larger positive values of  $\sigma_1$  occur close to  $t = 0$  and  $t = T$ , or  $m = 0$  and  $m = 1$ .

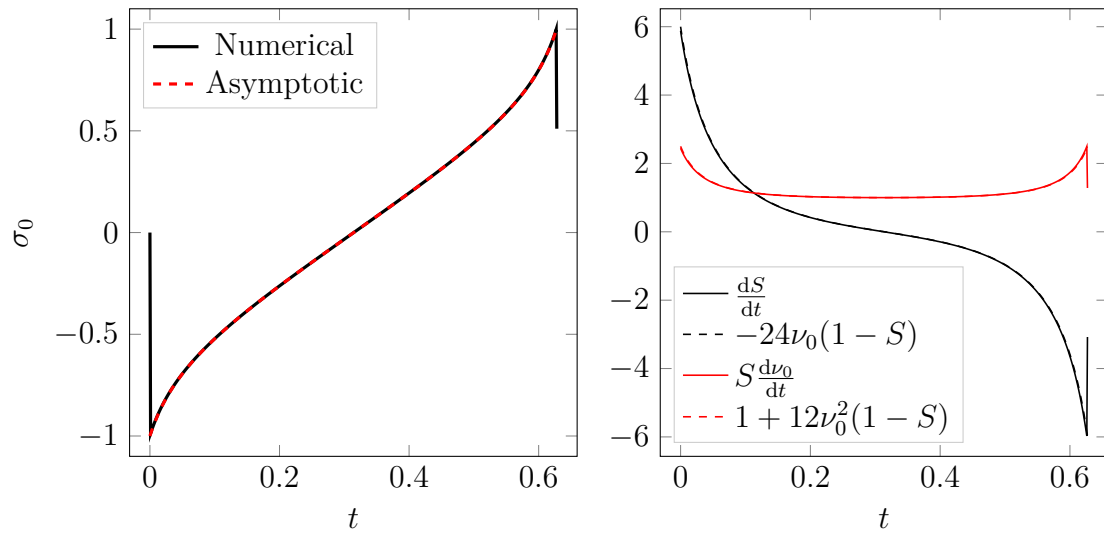

(a) Leading-order bulk stress,  $\sigma_0$ .

(b) System of ODEs, (3.9).

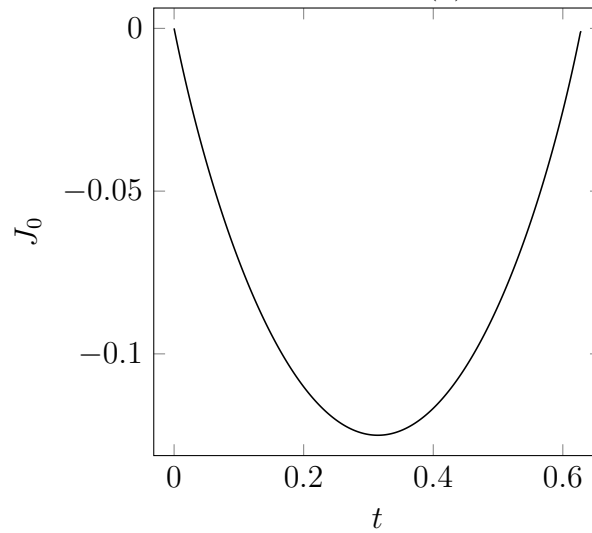

(c)  $J_0$

Figure 4.1: Comparison between a numerical solution with rigid filaments ( $\varepsilon = 1 \times 10^{-5}$ ) and the leading-order asymptotic solution.

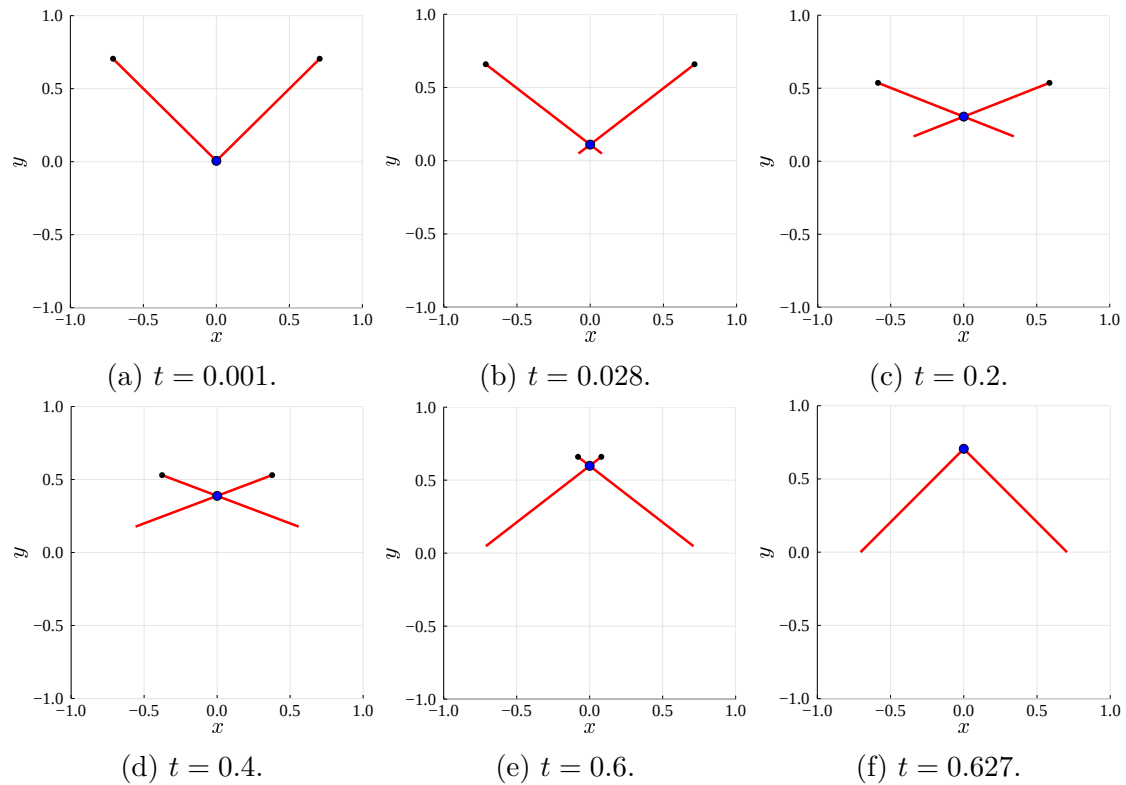

Figure 4.2: Numerical solution for the evolution of two actin filaments (red solid curves) with  $\varepsilon = 0.01$ . The black nodes indicate the filament plus ends, and the blue dot at the filament intersection represents the myosin motor.

210 Figure 4.4a is surprising, because it suggests the introduction of filament bending generates  
211 stresses that are biased to expansion. Similarly, as Figure 4.4b shows, the quantity  
212  $J_1(T) - J_1(0) > 0$ , also suggesting net expansive bias. Based on this, one might conclude  
213 that bending cannot facilitate microscopic-scale contraction. However, we have not yet  
214 accounted for the changes in filament geometry, and how they influence motor dynamics.  
215 Further simulations in §4.2 will reveal this more clearly, and confirm that bending does  
216 facilitate net microscopic-scale contraction.

## 217 4.2 Symmetric Flexible Filaments

218 We now consider numerical solutions beyond the  $\varepsilon \ll 1$  regime considered in the asymptotic  
219 analysis. These solutions are with the same conditions as Figure 4.2, where the motor  
220 is initially at the minus-ends of two symmetric filaments. We then solve the model until  
221 the motor reaches the plus-ends. Results are presented in Figure 4.5. The quantity  $J(t)$   
222 measures the effect of  $\varepsilon$  on net stress. This is shown in Figure 4.5a. For rigid filaments,  
223 we showed that  $J(T) - J(0) = 0$ , indicating zero net stress as the motor moved from the  
224 minus to the plus-ends. Since  $J(T)$  decreases as  $\varepsilon$  increases, the introduction of filament  
225 bending facilitates bias to contraction. This is despite the quantities  $\sigma_1(T)$  and  $J_1(T)$   
226 being positive, as in Figure 4.4a and 4.4b. Indeed, Figure 4.5b confirms that  $\sigma_1 > 0$ , with

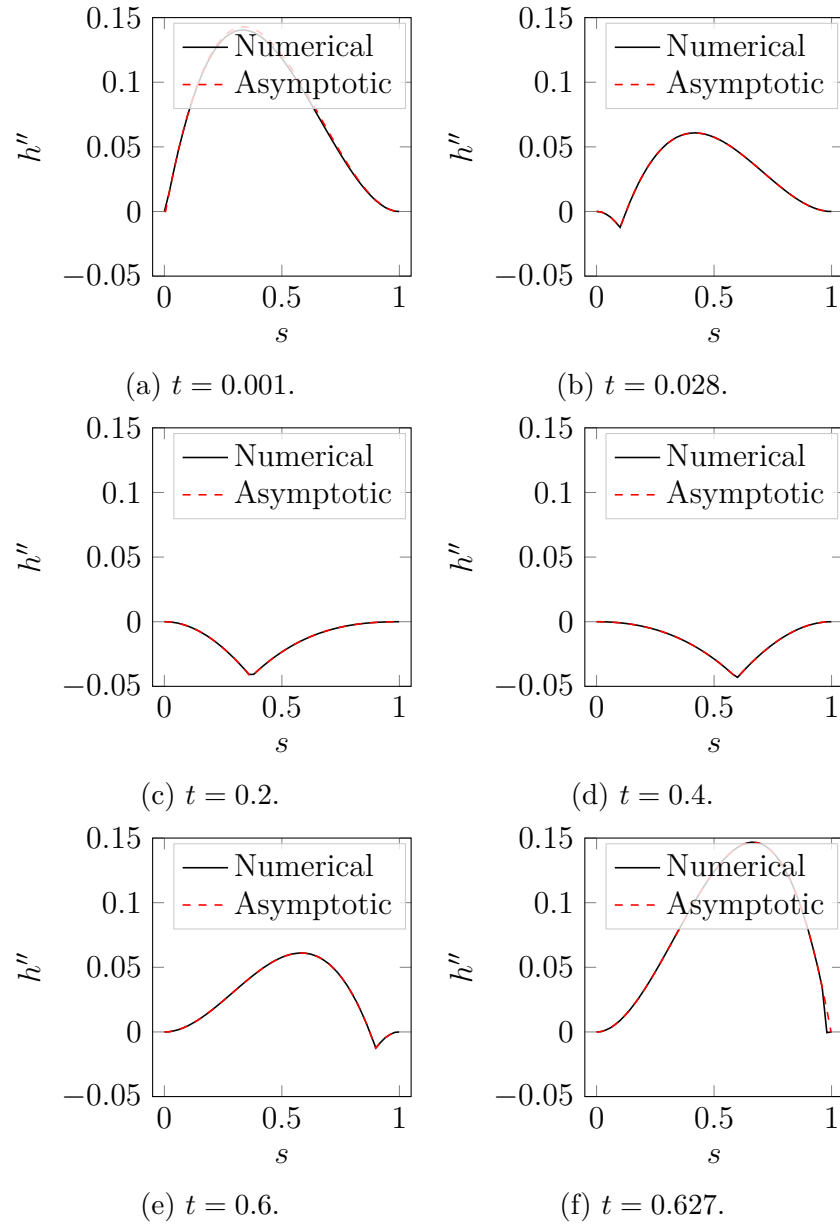

Figure 4.3: Numerical and asymptotic solutions for  $h''(s, t)$ , the curvature of  $z_1$ , in a numerical solution with  $\varepsilon = 0.01$ , and  $\theta(0) = \pi/2$ .

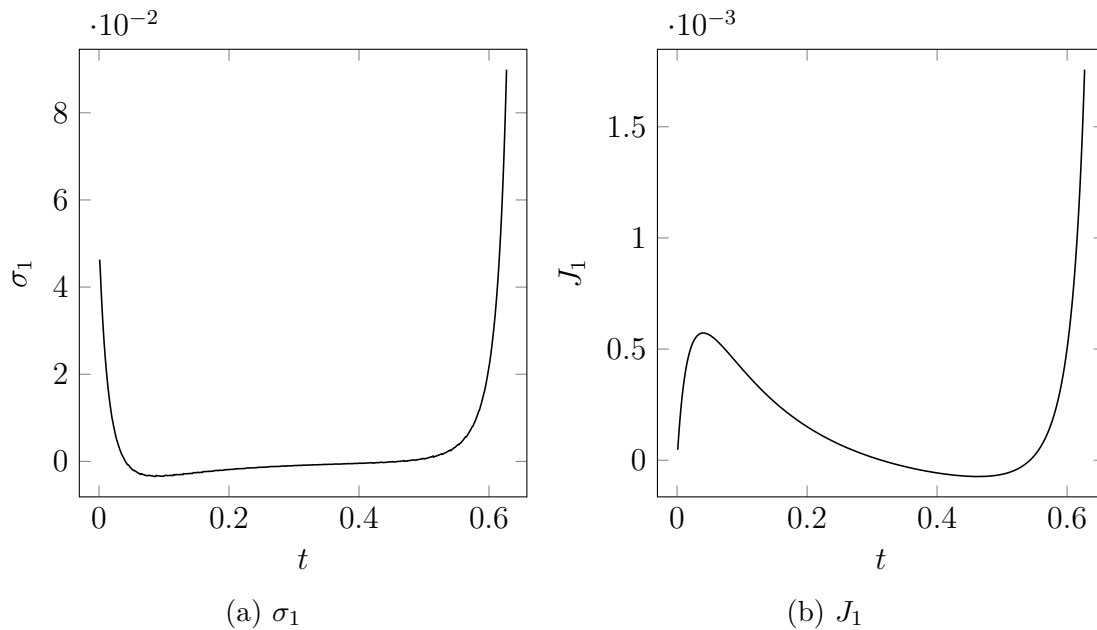

Figure 4.4: Calculation of  $\sigma_1 \approx (\sigma - \sigma_0)/\varepsilon$  and  $J_1 \approx (J - J_0)/\varepsilon$  in the numerical solution with  $\varepsilon = 0.01$ . The values of  $\sigma_0$  and  $J_0$  were obtained using a solution with  $\varepsilon = 1 \times 10^{-4}$ .

227 stress increasing with  $\varepsilon$  close to  $t = 0$  and  $t = T$ .

228 Semi-flexible filaments facilitates net contraction because bending breaks the polarity-  
 229 reversal symmetry, and the resulting geometry favours contraction. As Figure 4.5c shows,  
 230 with increasing  $\varepsilon$ , the myosin motor moves faster along the filaments and detaches earlier.  
 231 The increase in motor speed is largest as the motor approaches the plus-ends, which  
 232 Figure 4.5b shows is associated with expansion. As the motor approaches the plus-ends,  
 233 the semi-flexible filaments adopt a convex shape that brings them closer to parallel at  
 234 their tips, as illustrated in Figure 4.5d. This decreases the spring force through the motor,  
 235 enabling it to move faster. Since the motor moves faster close to the plus-ends, the expansive  
 236 component persists for shorter time than the contractile component. Consequently, the  
 237 time-integrated stress  $J(T) - J(0)$  decreases as  $\varepsilon$  increases.

238 The results in Figure 4.5 are relevant for *in vivo* actin filaments, for which the parameters  
 239 (Kamasaki, Osumi, and Mabuchi 2007; Gittes et al. 1993; Thoresen, Lenz, and Gardel  
 240 2011; Reichl et al. 2008; Oelz, Rubinstein, and Mogilner 2015) estimated in Tam, Mogilner,  
 241 and Oelz (2021) give  $\varepsilon = 68.5$ . To further our analysis, we compute a numerical solution  
 242 with  $\varepsilon = 68.5$  and  $V_m = 1$ , to investigate whether contraction persists after relaxing  
 243 the assumption of infinite motor velocity. The evolution of these filaments is shown  
 244 in Figure 4.6. Despite the slower motor speed, the evolution qualitatively follows the  
 245 prediction from Figure 4.3. Filaments are initially convex, then become concave, and  
 246 adopt a convex shape again as the motor approaches the plus-ends. As Figure 4.6f shows,  
 247 the two filaments are curved when the motor reaches the plus-ends and detaches. To  
 248 rule out the possibility that relaxation to straight configuration produces expansion that  
 249 cancels out net contraction, we continued the simulation after motor detachment, until the

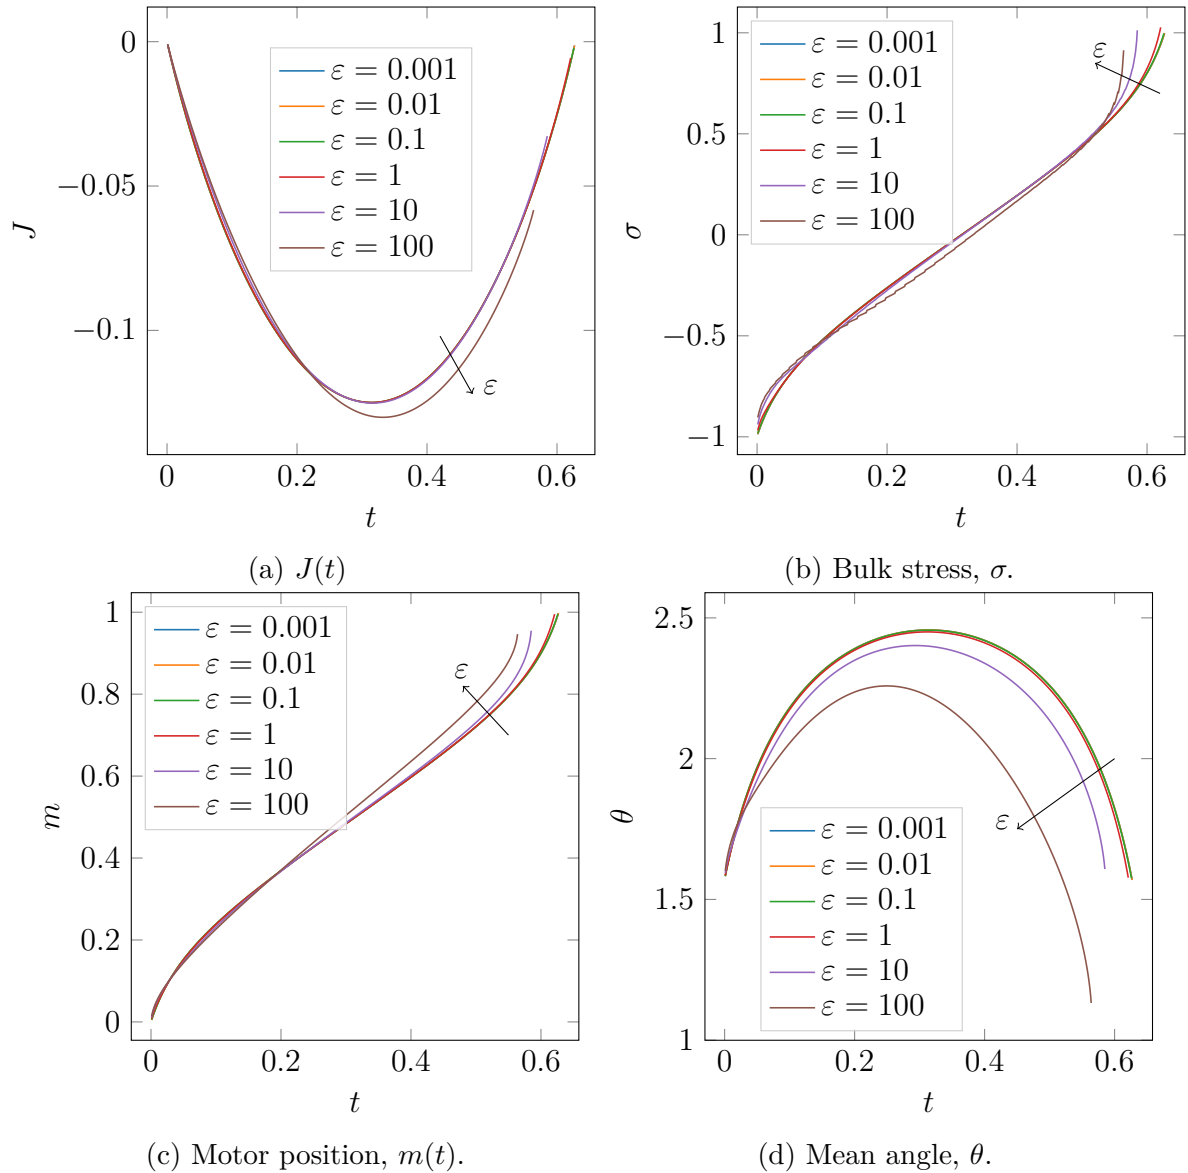

Figure 4.5: The effect of  $\varepsilon$  on relevant quantities in solutions of two symmetric filaments. Solutions are computed with  $m(0) = 0$ ,  $\theta(0) = \pi/2$ , and proceed for all  $t \in [0, T(\varepsilon)]$  such that  $m(t) < 1$ . After this time  $T$ , the motor reaches the plus-end and detaches. Results are plotted for six values of  $\varepsilon$ , and arrows indicate the direction of increasing  $\varepsilon$ .

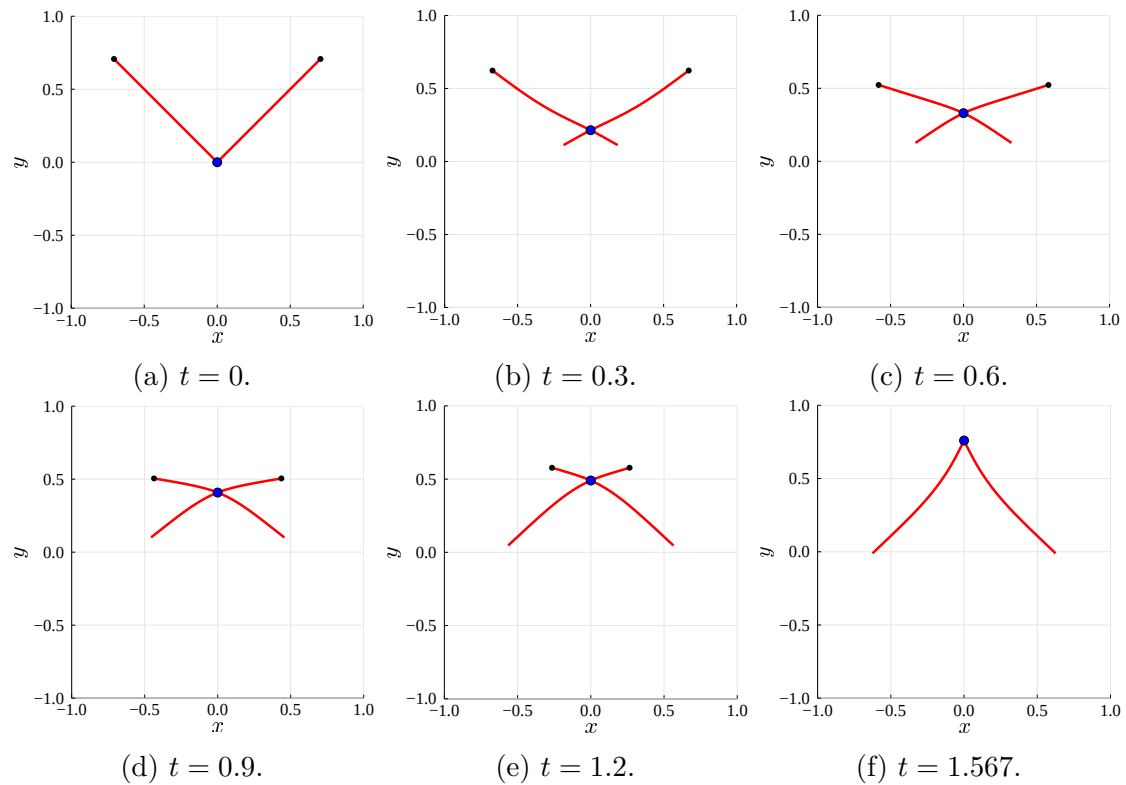

Figure 4.6: Numerical solution for the evolution of two flexible actin filaments (red solid curves) with  $\varepsilon = 68.5$  and  $V_m = 1$ . The black nodes indicate the filament plus ends, and the blue dot at the filament intersection represents the myosin motor.

250 filaments were again straight. We plot  $\sigma(t)$  and  $J(t)$  in Figure 4.7. Although relaxation to  
 251 the straight configuration (shown in Figure 4.7a) generates a small amount of expansive  
 252 stress, Figure 4.7c shows  $J(2) - J(0) < 0$ , suggesting net contraction. Thus, our proposed  
 253 geometric mechanism for contraction remains relevant for realistic filament flexural rigidity  
 254 and motor speed. Since actomyosin networks (for example those in the cortex) consist of  
 255 many cross-linked two-filament assemblies, our mechanism provides a possible explanation  
 for the microscopic origin of network-scale actomyosin contraction.

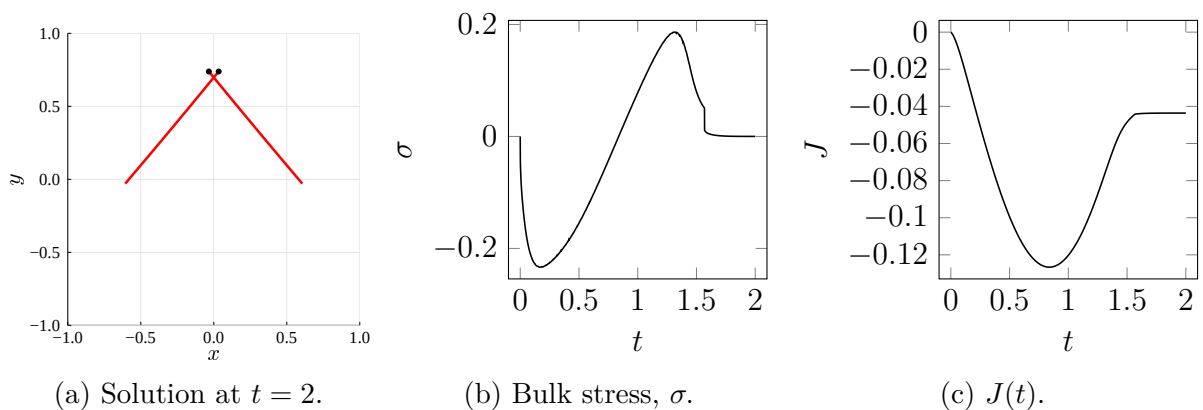

Figure 4.7: The final filament configuration, bulk stress,  $\sigma$ , and  $J(t)$  for the flexible filament ( $\varepsilon = 68.5$  and  $V_m = 1$ ) solution in Figure 4.6.

## 257 **5 Conclusion**

258 Understanding the origins of actomyosin contraction is an open problem in cellular  
259 biophysics, with implications for cell movement and division. In this paper, we presented  
260 a detailed investigation of how two a two-filament-motor system generates microscopic  
261 contraction if the filaments are flexible. We first derived a partial differential equation  
262 model, and described a method of computing in-plane stress. We then applied asymptotic  
263 analysis to a symmetric system with infinite free-moving motor velocity. The leading-order  
264 solution showed that two rigid filaments do not generate net stress if the motor traverses  
265 the entire length of the filaments. However, the introduction of filament bending enables  
266 the two-filament structure to generate net contraction. This is because bending breaks  
267 the polarity-reversal symmetry of rigid filaments. The resulting geometric asymmetry  
268 draws the plus-ends closer to parallel as the motor approaches. This facilitates faster  
269 motor movement when motors are close to filament plus-ends, and inhibits production of  
270 expansive stress.

271 Our analysis confirms that the microscopic dynamics of symmetric filament pairs  
272 and motors can explain contraction. We expect that the same mechanism also favours  
273 contraction in non-symmetric fibre-motor assemblies and that, consequently, macroscopic  
274 contraction in disordered networks could arise from the accumulation of multiple filament  
275 pairs, without the need for nonlinear amplification of contractile stress. Nevertheless, the  
276 question of how these results apply to networks, in which filaments cross at arbitrary angle  
277 and position, remains open. In Tam, Mogilner, and Oelz (2021) it has been confirmed  
278 that such networks relying on the biomechanical model for semi-flexible fibres and motors  
279 presented in this study do contract. We also mention that another potential approach is  
280 to derive a coarse-grained, continuum model based on the assumption of infinite filament  
281 length (Oelz 2014). This, and understanding how these microscopic mechanics give rise  
282 to structures including stress fibres (Pellegrin and Mellor 2007) and the contractile ring  
283 (Kamasaki, Osumi, and Mabuchi 2007; Svitkina 2018), will be subjects of future work.

## 284 **Acknowledgements**

285 The authors acknowledge funding from the Australian Research Council (ARC) Discovery  
286 Program (grant number DP180102956), awarded to D. B. O. and A. M.

## 287 **Declaration**

288 The authors have no conflicts of interest to declare.



## 289 References

- 290 Belmonte, J. M., M. Leptin, and F. J. Nédélec (2017), “A theory that predicts behaviors of  
291 disordered cytoskeletal networks”, *Molecular Systems Biology* 13, 941, DOI: [10.15252/  
292 msb.20177796](https://doi.org/10.15252/msb.20177796).
- 293 Bidone, T. C., W. Jung, D. Maruri, C. Borau, R. D. Kamm, and T. Kim (2017), “Mor-  
294 phological transformation and force generation of active cytoskeletal networks”, *PLoS  
295 Computational Biology* 13, e1005277, DOI: [10.1371/journal.pcbi.1005277](https://doi.org/10.1371/journal.pcbi.1005277).
- 296 Bormuth, V., V. Varga, J. Howard, and E. Schäffer (2009), “Protein friction limits diffusive  
297 and directed movements of kinesin motors in microtubules”, *Science* 325, pp. 870–873,  
298 DOI: [10.1126/science.1174923](https://doi.org/10.1126/science.1174923).
- 299 Broedersz, C. P. and F. C. Mackintosh (2014), “Modeling semiflexible polymer networks”,  
300 *Reviews of Modern Physics* 86, pp. 995–1036, DOI: [10.1103/RevModPhys.86.995](https://doi.org/10.1103/RevModPhys.86.995).
- 301 Chalut, K. J. and E. K. Paluch (2016), “The actin cortex: a bridge between cell shape and  
302 function”, *Developmental Cell* 38, pp. 571–573, DOI: [10.1016/j.devcel.2016.09.011](https://doi.org/10.1016/j.devcel.2016.09.011).
- 303 Cheffings, T. H., N. J. Burroughs, and M. K. Balasubramanian (2016), “Actomyosin  
304 ring formation and tension generation in eukaryotic cytokinesis”, *Current Biology* 26,  
305 R719–R739, DOI: [10.1016/j.cub.2016.06.071](https://doi.org/10.1016/j.cub.2016.06.071).
- 306 Dasanayake, N. L., P. J. Michalski, and A. E. Carlsson (2011), “General mechanism  
307 of actomyosin contractility”, *Physical Review Letters* 107, 118101, DOI: [10.1103/  
308 PhysRevLett.107.118101](https://doi.org/10.1103/PhysRevLett.107.118101).
- 309 De La Cruz, E. M. and M. L. Gardel (2015), “Actin mechanics and fragmentation”, *Journal  
310 of Biological Chemistry* 290, pp. 17137–17144, DOI: [10.1074/jbc.R115.636472](https://doi.org/10.1074/jbc.R115.636472).
- 311 du Roure, O., A. Lindner, E. N. Nazockdast, and M. J. Shelley (2019), “Dynamics of  
312 flexible fibers in viscous flows and fluids”, *Annual Review of Fluid Mechanics* 51,  
313 pp. 539–572, DOI: [10.1146/annurev-fluid-122316-045153](https://doi.org/10.1146/annurev-fluid-122316-045153).
- 314 Ennomani, H., G. Letort, C. Guérin, J. Martiel, W. Cao, F. J. Nédélec, E. M. De La Cruz,  
315 M. Théry, and L. Blanchoin (2016), “Architecture and connectivity govern actin network  
316 contractility”, *Current Biology* 26, pp. 616–626, DOI: [10.1016/j.cub.2015.12.069](https://doi.org/10.1016/j.cub.2015.12.069).
- 317 Freedman, S. L., S. Banerjee, G. M. Hocky, and A. R. Dinner (2017), “A versatile framework  
318 for simulating the dynamic mechanical structure of cytoskeletal networks”, *Biophysical  
319 Journal* 113, pp. 448–460, DOI: [10.1016/j.bpj.2017.06.003](https://doi.org/10.1016/j.bpj.2017.06.003).
- 320 Freedman, S. L., G. M. Hocky, S. Banerjee, and A. R. Dinner (2018), “Nonequilibrium  
321 phase diagrams for actomyosin networks”, *Soft Matter* 14, pp. 7740–7747, DOI: [10.  
322 1039/c8sm00741a](https://doi.org/10.1039/c8sm00741a).
- 323 Gautel, M. (2011), “The sarcomeric cytoskeleton: who picks up the strain?”, *Current  
324 Opinion in Cell Biology* 23, pp. 39–46, DOI: [10.1016/j.ceb.2010.12.001](https://doi.org/10.1016/j.ceb.2010.12.001).

- 325 Gittes, F., B. Mickey, J. Nettleton, and J. Howard (1993), “Flexural rigidity of microtubules  
326 and actin filaments measured from thermal fluctuations in shape”, *Journal of Cell*  
327 *Biology* 120, pp. 923–934, DOI: [10.1083/jcb.120.4.923](https://doi.org/10.1083/jcb.120.4.923).
- 328 Head, D. A., A. J. Levine, and F. C. MacKintosh (2003), “Distinct regimes of elastic  
329 response and deformation modes of cross-linked cytoskeletal and semiflexible polymer  
330 networks”, *Physical Review E* 68, 061907, DOI: [10.1103/PhysRevE.68.061907](https://doi.org/10.1103/PhysRevE.68.061907).
- 331 Hiraiwa, T. and G. Salbreux (2016), “Role of turnover in active stress generation in a  
332 filament network”, *Physical Review Letters* 116, 188101, DOI: [10.1103/PhysRevLett.  
333 116.188101](https://doi.org/10.1103/PhysRevLett.116.188101).
- 334 Huxley, H. E. (2004), “Fifty years of muscle and the sliding filament hypothesis”, *European*  
335 *Journal of Biochemistry* 271, pp. 1403–1415, DOI: [10.1111/j.1432-1033.2004.04044.  
336 x](https://doi.org/10.1111/j.1432-1033.2004.04044.x).
- 337 Kamasaki, T., M. Osumi, and I. Mabuchi (2007), “Three-dimensional arrangement of  
338 F-actin in the contractile ring of fission yeast”, *Journal of Cell Biology* 178, pp. 765–771,  
339 DOI: [10.1083/jcb.200612018](https://doi.org/10.1083/jcb.200612018).
- 340 Kim, T. (2015), “Determinants of contractile forces generated in disorganized actomyosin  
341 bundles”, *Biomechanics and Modeling in Mechanobiology* 14, pp. 345–355, DOI: [10.  
342 1007/s10237-014-0608-2](https://doi.org/10.1007/s10237-014-0608-2).
- 343 Komianos, J. E. and G. A. Papoian (2018), “Stochastic ratcheting on a funneled energy  
344 landscape is necessary for highly efficient contractility of actomyosin force dipoles”,  
345 *Physical Review X* 8, 021006, DOI: [10.1103/PhysRevX.8.021006](https://doi.org/10.1103/PhysRevX.8.021006).
- 346 Langer, J. and D. A. Singer (1984), “Knotted elastic curves in  $\mathbb{R}^3$ ”, *Journal of the London*  
347 *Mathematical Society* 30, pp. 512–520, DOI: [10.1112/jlms/s2-30.3.512](https://doi.org/10.1112/jlms/s2-30.3.512).
- 348 — (1987), “Curve-straightening in Riemannian manifolds”, *Annals of Global Analysis and*  
349 *Geometry* 5, pp. 133–150, DOI: [10.1007/BF00127856](https://doi.org/10.1007/BF00127856).
- 350 Lenz, M. (2014), “Geometrical origins of contractility in disordered actomyosin networks”,  
351 *Physical Review X* 4, 041002, DOI: [10.1103/PhysRevX.4.041002](https://doi.org/10.1103/PhysRevX.4.041002).
- 352 — (2020), “Reversal of contractility as a signature of self-organization in cytoskeletal  
353 bundles”, *eLife* 9, e51751, DOI: [10.7554/eLife.51751](https://doi.org/10.7554/eLife.51751).
- 354 Lenz, M., T. Thoresen, M. L. Gardel, and A. R. Dinner (2012), “Contractile units in  
355 disordered actomyosin bundles arise from F-actin buckling”, *Physical Review Letters*  
356 108, 238107, DOI: [10.1103/PhysRevLett.108.238107](https://doi.org/10.1103/PhysRevLett.108.238107).
- 357 Letort, G., A. Z. Politi, H. Ennomani, M. Théry, F. J. Nédélec, and L. Blanchoin (2015),  
358 “Geometrical and mechanical properties control actin filament organization”, *PLoS*  
359 *Computational Biology* 11, e1004245, DOI: [10.1371/journal.pcbi.1004245](https://doi.org/10.1371/journal.pcbi.1004245).
- 360 Linnér, A. (1989), “Some properties of the curve straightening flow in the plane”, *Transa-*  
361 *tions of the American Mathematical Society* 314, pp. 605–617, DOI: [10.1090/s0002-  
362 9947-1989-0989580-5](https://doi.org/10.1090/s0002-9947-1989-0989580-5).

- 363 Linnér, A. (2003), “Symmetrized curve-straightening”, *Differential Geometry and its*  
364 *Applications* 18, pp. 119–146, DOI: [10.1016/S0926-2245\(02\)00144-4](https://doi.org/10.1016/S0926-2245(02)00144-4).
- 365 McFadden, W. M., P. M. McCall, M. L. Gardel, and E. M. Munro (2017), “Filament  
366 turnover tunes both force generation and dissipation to control long-range flows in a  
367 model actomyosin cortex”, *PLoS Computational Biology* 13, e1005811, DOI: [10.1371/  
368 journal.pcbi.1005811](https://doi.org/10.1371/journal.pcbi.1005811).
- 369 Mogensen, P. K. and A. N. Risbeth (2018), “Optim: A mathematical optimization package  
370 for Julia”, *Journal of Open Source Software* 3, 615, DOI: [10.21105/joss.00615](https://doi.org/10.21105/joss.00615).
- 371 Murrell, M. P. and M. L. Gardel (2012), “F-actin buckling coordinates contractility and  
372 severing in biomimetic actomyosin cortex”, *Proceedings of the National Academy of*  
373 *Science of the United States of America* 109, pp. 20820–20825, DOI: [10.1073/pnas.  
374 1214753109](https://doi.org/10.1073/pnas.1214753109).
- 375 Murrell, M. P., P. W. Oakes, M. Lenz, and M. L. Gardel (2015), “Forcing cells into shape:  
376 the mechanics of actomyosin contractility”, *Nature Reviews Molecular Cell Biology* 16,  
377 pp. 486–498, DOI: [10.1038/nrm4012](https://doi.org/10.1038/nrm4012).
- 378 Oelz, D. B. (2011), “On the curve straightening flow of inextensible, open, planar curves”,  
379 *SeMA Journal: Bulletin of the Spanish Society of Applied Mathematics* 54, pp. 5–24,  
380 DOI: [10.1007/BF03322585](https://doi.org/10.1007/BF03322585).
- 381 — (2014), “A viscous two-phase model for contractile actomyosin bundles”, *Journal of*  
382 *Mathematical Biology* 68, pp. 1653–1676, DOI: [10.1007/s00285-013-0682-6](https://doi.org/10.1007/s00285-013-0682-6).
- 383 Oelz, D. B., B. Y. Rubinstein, and A. Mogilner (2015), “A combination of actin treadmilling  
384 and cross-linking drives contraction of random actomyosin arrays”, *Biophysical Journal*  
385 109, pp. 1818–1829, DOI: [10.1016/j.bpj.2015.09.013](https://doi.org/10.1016/j.bpj.2015.09.013).
- 386 Pellegrin, S. and H. Mellor (2007), “Actin stress fibres”, *Journal of Cell Science* 120,  
387 pp. 3491–3499, DOI: [10.1242/jcs.018473](https://doi.org/10.1242/jcs.018473).
- 388 Pollard, T. D. (2010), “Mechanics of cytokinesis in eukaryotes”, *Current Opinion in Cell*  
389 *Biology* 22, pp. 50–56, DOI: [10.1016/j.ceb.2009.11.010](https://doi.org/10.1016/j.ceb.2009.11.010).
- 390 Pollard, T. D. and B. O’Shaughnessy (2019), “Molecular mechanism of cytokinesis”,  
391 *Annual Review of Biochemistry* 88, pp. 661–689, DOI: [10.1146/annurev-biochem-  
392 062917012530](https://doi.org/10.1146/annurev-biochem-062917012530).
- 393 Popov, K., J. E. Komianos, and G. A. Papoian (2016), “MEDYAN: Mechanochemical  
394 simulations of contraction and polarity alignment in actomyosin networks”, *PLoS*  
395 *Computational Biology* 12, e1004877, DOI: [10.1371/journal.pcbi.1004877](https://doi.org/10.1371/journal.pcbi.1004877).
- 396 Reichl, E. M., Y. Ren, M. K. Morphey, M. Delannoy, J. C. Effler, K. D. Girard, S. Divi,  
397 P. A. Iglesias, S. C. Kuo, and D. N. Robinson (2008), “Interactions between myosin and  
398 actin crosslinkers control cytokinesis contractility dynamics and mechanics”, *Current*  
399 *Biology* 18, pp. 471–480, DOI: [10.1016/j.cub.2008.02.056](https://doi.org/10.1016/j.cub.2008.02.056).

- 400 Ronceray, P., C. P. Broedersz, and M. Lenz (2016), “Fiber networks amplify active stress”,  
401 *Proceedings of the National Academy of Science of the United States of America* 113,  
402 pp. 2827–2832, DOI: [10.1073/pnas.1514208113](https://doi.org/10.1073/pnas.1514208113).
- 403 Soares e Silva, M., M. Depken, B. Stuhmann, M. Korsten, F. C. MacKintosh, and G. H.  
404 Koenderink (2011), “Active multistage coarsening of actin networks driven by myosin  
405 motors”, *Proceedings of the National Academy of Science of the United States of*  
406 *America* 108, pp. 9408–9413, DOI: [10.1073/pnas.1016616108](https://doi.org/10.1073/pnas.1016616108).
- 407 Stachowiak, M. R., C. Laplante, H. F. Chin, B. Guirao, E. Karatekin, T. D. Pollard, and B.  
408 O’Shaughnessy (2014), “Mechanism of cytokinetic contractile ring constriction in fission  
409 yeast”, *Developmental Cell* 29, pp. 547–561, DOI: [10.1016/j.devcel.2014.04.021](https://doi.org/10.1016/j.devcel.2014.04.021).
- 410 Svitkina, T. M. (2018), “Ultrastructure of the actin cytoskeleton”, *Current Opinion in*  
411 *Cell Biology* 54, pp. 1–8, DOI: [10.1016/j.ceb.2018.02.007](https://doi.org/10.1016/j.ceb.2018.02.007).
- 412 Tam, A. K. Y., A. Mogilner, and D. B. Oelz (2021), “Protein friction and filament bending  
413 facilitate contraction of disordered actomyosin networks”, *Biophysical Journal*, in press,  
414 DOI: <https://doi.org/10.1016/j.bpj.2021.08.012>.
- 415 Tawada, K. and K. Sekimoto (1991), “Protein friction exerted by motor enzymes through  
416 a weak-binding interaction”, *Journal of Theoretical Biology* 150, pp. 193–200, DOI:  
417 [10.1016/S0022-5193\(05\)80331-5](https://doi.org/10.1016/S0022-5193(05)80331-5).
- 418 Thoresen, T., M. Lenz, and M. L. Gardel (2011), “Reconstitution of contractile actomyosin  
419 bundles”, *Biophysical Journal* 100, pp. 2698–2705, DOI: [10.1016/j.bpj.2011.04.031](https://doi.org/10.1016/j.bpj.2011.04.031).
- 420 Wen, Y. (1993), “ $L^2$  flow of curve straightening in the plane”, *Duke Mathematics Journal*  
421 70, pp. 683–698, DOI: [10.1215/S0012-7094-93-07016-0](https://doi.org/10.1215/S0012-7094-93-07016-0).
- 422 — (1995), “Curve straightening flow deforms closed plane curves with nonzero rotation  
423 number to circles”, *Journal of Differential Equations* 120, pp. 89–107, DOI: [10.1006/  
424 jdeq.1995.1106](https://doi.org/10.1006/jdeq.1995.1106).
- 425 Yamada, K. M. and M. Sixt (2019), “Mechanisms of 3D cell migration”, *Nature Reviews*  
426 *Molecular Cell Biology* 20, pp. 738–752, DOI: [10.1038/s41580-019-0172-9](https://doi.org/10.1038/s41580-019-0172-9).
- 427 Yu, Q., J. Li, M. P. Murrell, and T. Kim (2018), “Balance between force generation and  
428 relaxation leads to pulsed contraction of actomyosin networks”, *Biophysical Journal*  
429 115, pp. 2003–2013, DOI: [10.1016/j.bpj.2018.10.008](https://doi.org/10.1016/j.bpj.2018.10.008).



which represents the Lagrange multiplier for the constraint

$$z(m_1, t) = z(m_2, t). \quad (\text{A.5})$$

This yields the ordinary differential equations

$$\frac{dm_1}{dt} = V_m \left[ 1 - \frac{\mu}{F_s} \frac{z_1 - z_2}{\|z_1 - z_2\|} \cdot z_1'(m_1, t) \right], \quad (\text{A.6a})$$

$$\frac{dm_2}{dt} = V_m \left[ 1 + \frac{\mu}{F_s} \frac{z_1 - z_2}{\|z_1 - z_2\|} \cdot z_2'(m_2, t) \right], \quad (\text{A.6b})$$

431 which are force-balance equations for the myosin motor positions  $m_1(t)$  and  $m_2(t)$ . The  
 432 equations (A.6) represent that unloaded motors (for which  $\mu = 0$ ) move at the free-moving  
 433 velocity,  $V_m$ . As the motor moves, it is exposed to stretching forces, with magnitude given  
 434 by the Lagrange multiplier  $\mu$ . The term involving the dot product is the projection of this  
 435 force onto the direction of motor movement along the  $i$ -th filament. Assuming a linear  
 436 force-velocity relationship its ratio with the stall force,  $F_s$ , determines the reduction of  
 437 motor speed due to stretching forces.

For the filament equations (A.4b) and (A.4d), in addition to  $\delta_m \rightarrow 0$ , we also let  $\delta_a \rightarrow 0$  enforcing the constraints

$$|z_i'| = 1, \quad i = 1, 2. \quad (\text{A.7})$$

We write the limits of  $2(|z_i'| - 1)/\delta_a$  as  $\lambda_i$  and apply integration by parts to remove derivatives of  $\delta z_i$  from under the integral sign. This yields

$$\begin{aligned} \int \kappa_a z_i'' \cdot \delta z_i'' + \lambda_i z_i' \cdot \delta z_i' ds &= \int \delta z_i \cdot [\kappa_a z_i'''' - (\lambda_i z_i')'] ds \\ &+ \delta z_i \cdot (\lambda_i z_i' - \kappa_a z_i''') + \kappa_a \delta z_i' \cdot z_i'' \end{aligned} \quad (\text{A.8})$$

We then rewrite equations (A.4b) and (A.4d) as

$$\begin{aligned} \int_0^{L_1} \delta z_1 \cdot \left[ \frac{\lambda_a}{\Delta t} (z_1 - \mathbf{F} z_1^n) + \kappa_a z_1'''' - (\lambda_1 z_1')' + \mu \frac{z_1 - z_2}{\|z_1 - z_2\|} \delta(s - m_1) \right] ds \\ + [\delta z_1 \cdot (\lambda_1 z_1' - \kappa_a z_1''') + \kappa_a \delta z_1' \cdot z_1'']_0^{L_1}, \end{aligned} \quad (\text{A.9a})$$

$$\begin{aligned} \int_0^{L_2} \delta z_2 \cdot \left[ \frac{\lambda_a}{\Delta t} (z_2 - \mathbf{F} z_2^n) + \kappa_a z_2'''' - (\lambda_2 z_2')' - \mu \frac{z_1 - z_2}{\|z_1 - z_2\|} \delta(s - m_2) \right] ds \\ + [\delta z_2 \cdot (\lambda_2 z_2' - \kappa_a z_2''') + \kappa_a \delta z_2' \cdot z_2'']_0^{L_2}, \end{aligned} \quad (\text{A.9b})$$

where  $\delta$  is the Dirac delta function. The equations (A.9) enable us to derive the continuum governing equations and boundary conditions. First, we require the filaments to have zero curvature at their tips,

$$z_i'' = 0 \quad \text{at} \quad s = 0, L_i. \quad (\text{A.10})$$

The remaining boundary terms in (A.9) then give rise to the conditions

$$\lambda_i z_i' - \kappa_a z_i''' = 0 \quad \text{at} \quad s = 0, L_i, \quad (\text{A.11})$$

which specifies that the boundary values vanish at  $s = 0, L_i$ . Next, we apply the fundamental lemma of the calculus of variations to the remaining integrals. In the continuum limit  $\Delta t \rightarrow 0$  for which  $\mathbf{F} = \mathbf{I}$ , and  $(z_i - z_i^n)/\Delta t = \dot{z}_i$ , we obtain

$$\lambda_a \frac{\partial z_1}{\partial t} + \kappa_a z_1'''' - (\lambda_1 z_1')' + \mu \frac{z_1 - z_2}{\|z_1 - z_2\|} \delta(s - m_1) = 0 \quad \text{on} \quad (0 < s < L_1), \quad (\text{A.12a})$$

$$\lambda_a \frac{\partial z_2}{\partial t} + \kappa_a z_2'''' - (\lambda_2 z_2')' - \mu \frac{z_1 - z_2}{\|z_1 - z_2\|} \delta(s - m_2) = 0 \quad \text{on} \quad (0 < s < L_2). \quad (\text{A.12b})$$

438 The differential equations (A.6) and (A.12), and conditions (A.10) and (A.11) as well  
 439 as the constraints (A.5) and (A.7) then define a system of force-balance equations and  
 440 boundary conditions that govern the evolution of two inextensible, semi-flexible filaments  
 441 connected to an inextensible motor. This is the dimensional PDE model (2.14)–(2.16)  
 442 given in the main text.

## 443 B Asymptotic Analysis

444 In this Appendix, we present the asymptotic analysis of §3 in more detail. We first outline  
 445 the method used to solve the leading-order problem (3.6), and subsequently consider the  
 446  $\mathcal{O}(\varepsilon)$  problem (3.14) for the first-order corrections.

### 447 B.1 Leading-Order Problem

We commence the analysis by considering the ansatz for rigid filaments. Taking the time derivative of (3.3) gives  $\partial_t z_0' = -z_0'^{\perp} \dot{\theta}/2$ , and taking four spatial derivatives of (3.7) yields  $z_1^{(5)} = h^{(5)} z_0'^{\perp}$ . Next, we can differentiate the governing equation of  $\mathcal{O}(1)$  (3.6a) once with respect to  $s$ , and substitute the two above expressions to obtain

$$-z_0'^{\perp} \frac{\dot{\theta}}{2} + h^{(5)} z_0'^{\perp} - \lambda_0'' z_0' + \mu_0 \begin{pmatrix} 1 \\ 0 \end{pmatrix} \delta'(s - m_0) = 0. \quad (\text{B.1})$$

We can now multiply the boundary condition (3.6c) by  $z_0'$ , and use the property  $z_1''' \cdot z_0' = 0$ , which follows from (3.6e), to obtain  $\lambda_0(0) = \lambda_0(1) = 0$ . Finally, multiplying (B.1) by  $z_0'$  implies that

$$\lambda_0 = \mu_0 \begin{pmatrix} 1 \\ 0 \end{pmatrix} \cdot z_0' (H(s - m_0) - s) = H(s - m_0) - s, \quad (\text{B.2})$$

where  $H(s)$  denotes the Heaviside step function. The Lagrange multiplier  $\mu_0 = 1/\sin(\theta/2)$ , by rearranging (3.6b). The leading-order bulk stress is then

$$\sigma_0 = -2 \int_0^1 \lambda_0 ds = -2\mu_0 \sin\left(\frac{\theta}{2}\right) \left(\frac{1}{2} - m_0\right) = -2\left(\frac{1}{2} - m_0\right) = 2\nu_0, \quad (\text{B.3})$$

448 where  $\nu_0 = m_0 - 1/2$ . This completes the derivation of the quantities listed in (3.8).

We now derive the ordinary differential equations (3.9) for  $y_0$ ,  $\theta$ , and  $\nu_0$ , the three degrees of freedom that govern the leading-order filament position,  $z_0$ . On taking the time derivative and variation, the ansatz (3.5) implies that

$$\partial_t z_0 = \begin{pmatrix} 0 \\ \dot{y}_0 \end{pmatrix} - z'_0 \dot{m}_0 - z_0'^{\perp} (s - m_0) \frac{\dot{\theta}}{2}, \quad (\text{B.4a})$$

$$\delta z_0 = \begin{pmatrix} 0 \\ \delta y_0 \end{pmatrix} - z'_0 \delta m_0 - z_0'^{\perp} (s - m_0) \frac{\delta\theta}{2}. \quad (\text{B.4b})$$

Integrating (3.6a) against  $\delta z_0$  then yields

$$\begin{aligned} 0 &= \int_0^1 \partial_t z_0 \cdot \delta z_0 ds + \mu_0 \begin{pmatrix} 1 \\ 0 \end{pmatrix} \cdot \left( \begin{pmatrix} 0 \\ \delta y_0 \end{pmatrix} - z'_0 \delta m_0 \right) \\ &= \int_0^1 \partial_t z_0 \cdot \delta z_0 ds - \mu_0 \sin(\theta/2) \delta m_0 \\ &= \int_0^1 \partial_t z_0 \cdot \delta z_0 ds - \delta m_0. \end{aligned} \quad (\text{B.5})$$

Substituting (B.4) into (B.5) then gives

$$\begin{aligned} 0 &= \int_0^1 \left( \begin{pmatrix} 0 \\ \dot{y}_0 \end{pmatrix} - z'_0 \dot{m}_0 - z_0'^{\perp} (s - m_0) \frac{\dot{\theta}}{2} \right) \cdot \left( \begin{pmatrix} 0 \\ \delta y_0 \end{pmatrix} - z'_0 \delta m_0 - z_0'^{\perp} (s - m_0) \frac{\delta\theta}{2} \right) ds - \delta m_0 \\ &= \begin{pmatrix} 0 \\ \delta y_0 \end{pmatrix} \cdot \int_0^1 \left( \begin{pmatrix} 0 \\ \dot{y}_0 \end{pmatrix} - z'_0 \dot{m}_0 - z_0'^{\perp} (s - m_0) \frac{\dot{\theta}}{2} \right) ds - \delta m_0 \left( \begin{pmatrix} 0 \\ \dot{y}_0 \end{pmatrix} \cdot z'_0 - \dot{m}_0 \right) \\ &\quad - \int_0^1 \left( z_0'^{\perp} \cdot \begin{pmatrix} 0 \\ \dot{y}_0 \end{pmatrix} - (s - m_0) \frac{\dot{\theta}}{2} \right) \cdot (s - m_0) \frac{\delta\theta}{2} ds - \delta m_0 \\ &= \delta y_0 \int_0^1 \left( \dot{y}_0 - \cos(\theta/2) \dot{m}_0 - \sin(\theta/2) (s - m_0) \frac{\dot{\theta}}{2} \right) ds - \delta m_0 (\dot{y}_0 \cos(\theta/2) - \dot{m}_0) \\ &\quad - \int_0^1 \left( \dot{y}_0 \sin(\theta/2) - (s - m_0) \frac{\dot{\theta}}{2} \right) \cdot (s - m_0) \frac{\delta\theta}{2} ds - \delta m_0 \\ &= \delta y_0 \left( \dot{y}_0 - \cos(\theta/2) \dot{m}_0 - \sin(\theta/2) (1/2 - m_0) \frac{\dot{\theta}}{2} \right) - \delta m_0 (1 + \dot{y}_0 \cos(\theta/2) - \dot{m}_0) \\ &\quad - \left( \dot{y}_0 \sin(\theta/2) (1/2 - m_0) - (1/3 - m_0 + m_0^2) \frac{\dot{\theta}}{2} \right) \frac{\delta\theta}{2}. \end{aligned}$$



Collecting the coefficients of  $\delta y_0$ ,  $\delta\theta$  and  $\delta m_0$ , we obtain the system of differential equations (writing  $\nu_0 = m_0 - 1/2$ )

$$\dot{y}_0 = (12\nu_0^2 + 1) \cot\left(\frac{\theta}{2}\right) \csc\left(\frac{\theta}{2}\right), \quad (\text{B.6a})$$

$$\dot{\theta} = -24\nu_0 \cot\left(\frac{\theta}{2}\right), \quad (\text{B.6b})$$

$$\dot{\nu}_0 = \csc^2\left(\frac{\theta}{2}\right) (1 + 6\nu_0^2(\cos(\theta) + 1)), \quad (\text{B.6c})$$

where  $\csc(\phi) = 1/\sin(\phi)$ . The equations (B.6b) and (B.6c) for  $\theta$  and  $\nu_0$  are also independent of  $y_0$ , suggesting that the solution is invariant to vertical translations. Furthermore, the trigonometric functions can be eliminated by writing  $S = \sin^2(\theta/2)$ , which yields

$$\frac{dS}{dt} = -24\nu_0(1 - S), \quad (\text{B.7a})$$

$$S \frac{d\nu_0}{dt} = 1 + 12\nu_0^2(1 - S). \quad (\text{B.7b})$$

449 This completes the derivation of equation (3.9).

## 450 B.2 Higher-Order Corrections

To obtain the higher-order corrections, we first use the leading-order equation (B.1) and the ansatz (3.7) to solve for  $h$ , the curvature of  $z_1$ . Multiplying (B.1) by  $z_0'^{\perp}$  and using  $z_1''' \cdot z_0' = 0$  (which follows from (3.6e)), we obtain  $h'''(0) = h'''(1) = 0$ , and subsequently

$$-\frac{\dot{\theta}}{2} + h'''' - \mu_0 \cos\left(\frac{\vartheta}{2}\right) \delta'(s - m_0) = 0. \quad (\text{B.8})$$

The boundary conditions  $h'''(0) = 0 = h'''(1)$  imply that

$$h''' = \frac{\dot{\vartheta}}{2} \frac{s(s-1)}{2} + \mu_0 \cos\left(\frac{\vartheta}{2}\right) (H(s - m_0) - s) \quad (\text{B.9})$$

and furthermore (since  $z_1''(0) = 0 = z_1''(1)$ ), substituting for  $\dot{\theta}$  and  $\mu_0$ ,

$$h'' = -\cot\left(\frac{\theta}{2}\right) [(m_0 - s)H(s - m_0) + s^2(m_0(2s - 3) - s + 2)], \quad (\text{B.10})$$

451 which is an expression for filament curvature,  $h''(s, t)$ .

We now obtain the perturbation solution for the bulk stress,  $\sigma_1$ , which requires knowledge of the quantities  $\mu_1$  and  $\lambda_1$ . First, we integrate (B.10) once with respect to  $s$ . This introduces another constant of integration, here denoted  $A(t)$ , which might be

time-dependent and cannot be determined from boundary data. Consequently, we write

$$h'(s, t) = \tilde{h}'(s, t) + A(t), \quad (\text{B.11})$$

where

$$\tilde{h}'(s, t) = \frac{\dot{\theta}}{2} \frac{s^3}{12} \left( \frac{s}{2} - 1 \right) + \mu_0 \cos \left( \frac{\theta}{2} \right) \left( \frac{1}{2} (m - s)^2 H(s - m) - \frac{s^3}{6} \right). \quad (\text{B.12})$$

Collecting the coefficients of  $\varepsilon$  in the governing equations with asymptotic expansions, we obtain the  $\mathcal{O}(\varepsilon)$  problem (3.14). On taking a derivative of (3.14a) and substituting  $z'_1 = h'(s, t)z_0^\perp = (A(t) + \tilde{h}'(s, t))z_0^\perp$ , we obtain

$$\begin{aligned} & (\dot{A} + \partial_t \tilde{h}') z_0^\perp + z_2'''' - ((\lambda_0(A + f'(t, s)))'' z_0^\perp + \lambda_1'' z_0') \\ & + \mu_1 \begin{pmatrix} 1 \\ 0 \end{pmatrix} \delta'(s - m_0) - \mu_0 \begin{pmatrix} 1 \\ 0 \end{pmatrix} \delta''(s - m_0) m_1 = 0. \end{aligned} \quad (\text{B.13})$$

Expanding the inextensibility constraint (3.14f) implies that  $z'_0 \cdot z_2^{(5)} = -(|z'_1|^2)^{(4)}/2$ . Multiplying (B.13) by  $z'_0$ , we obtain

$$-\frac{1}{2}(|z'_1|^2)^{(4)} - \lambda_1'' + \begin{pmatrix} 1 \\ 0 \end{pmatrix} \cdot z'_0 [\mu_1 \delta'(s - m_0) - \mu_0 \delta''(s - m_0) m_1] = 0. \quad (\text{B.14})$$

We can integrate (B.14) twice and apply the boundary conditions (3.14c) to determine the constants of integration. This yields

$$\frac{1}{2}(|z'_1|^2)'' + \lambda_1 = \begin{pmatrix} 1 \\ 0 \end{pmatrix} \cdot z'_0 \left[ \mu_1 \left( H(s - m_0) - \frac{s}{L} \right) - \mu_0 \delta(s - m_0) m_1 \right], \quad (\text{B.15})$$

which we can rearrange to obtain  $\lambda_1$ . To eliminate  $\mu_1$  from (B.15), we use (3.14b) to infer an expression for  $\mu_1$ . Substituting the ansatzes (3.5) and (3.7) for  $z_0$  and  $z_1$  respectively, we obtain

$$\begin{aligned} 0 &= - \begin{pmatrix} 1 \\ 0 \end{pmatrix} \cdot (\mu_1 z'_0 + \mu_0 h'(s, t) z_0^\perp(m_0, t)) \\ &= - \left( \sin \left( \frac{\theta}{2} \right) \mu_1 - \cos \left( \frac{\theta}{2} \right) \mu_0 h'(m_0, t) \right), \end{aligned}$$

and therefore

$$\mu_1 = \mu_0 h'(m_0, t) \frac{\cos(\theta/2)}{\sin(\theta/2)} = \mu_0 (A + \tilde{h}'(m_0, t)) \cot \left( \frac{\theta}{2} \right). \quad (\text{B.16})$$

Substituting (B.16) into (B.15), we obtain

$$\begin{aligned}\lambda_1 &= \begin{pmatrix} 1 \\ 0 \end{pmatrix} \cdot z'_0 \left[ \left( \mu_0 (A + \tilde{h}'(m_0, t)) \cot \left( \frac{\theta}{2} \right) \right) (H(s - m_0) - s) - \mu_0 \delta(s - m_0) m_1 \right] \\ &\quad - \frac{1}{2} (|z'_1|^2)'' \\ &= (A + \tilde{h}'(m_0, t)) \cot \left( \frac{\theta}{2} \right) (H(s - m_0) - s) - \delta(s - m_0) m_1 - (z'_1 \cdot z'_1)'.\end{aligned}\quad (\text{B.17})$$

Using the simplified expression (B.17) for  $\lambda_1$ , we can write the first-order perturbation of the bulk stress (3.12), given by

$$\begin{aligned}\sigma_1 &= -2 \int_0^1 (|z_1''|^2 + \lambda_1) \, ds \\ &= -2 \int_0^1 |h''|^2 \, ds - 2 (A + \tilde{h}'(m_0, t)) \cot \left( \frac{\theta}{2} \right) \left( \frac{1}{2} - m_0 \right) + 2m_1,\end{aligned}\quad (\text{B.18})$$

where  $\tilde{h}'(m_0, t)$  is

$$\begin{aligned}\tilde{h}'(m_0, t) &= \frac{\dot{\theta}}{2} \frac{m_0^3}{12} \left( \frac{m_0}{2} - 1 \right) + \cot \left( \frac{\theta}{2} \right) \left( -\frac{m_0^3}{6} \right) \\ &= \frac{1}{2} \left( -12(2m_0 - 1) \cot \left( \frac{\theta}{2} \right) \right) \frac{m_0^3}{12} \left( \frac{m_0}{2} - 1 \right) + \cot \left( \frac{\theta}{2} \right) \left( -\frac{m_0^3}{6} \right) \\ &= \cot \left( \frac{\theta}{2} \right) \left( -\frac{m_0^3}{12} \right) \left[ (12m_0 - 6) \left( \frac{m_0}{2} - 1 \right) + 2 \right] \\ &= -\frac{1}{12} m_0^3 (6m_0^2 - 15m_0 + 8) \cot \left( \frac{\theta}{2} \right).\end{aligned}\quad (\text{B.19})$$

To solve for the first-order correction to the filament positions,  $z_1$ , we require an initial condition, here denoted  $z_{I,1}(s) = z_1(s, 0)$ . To determine the asymptotic expansion of the initial condition (2.28c), we return to the force-balance equations (2.1), and its equivalent time-discrete energy minimisation problem for the functional (2.2). In this expression, the drag component (2.3) dominates when  $\Delta t$  is small. Therefore, we determine the leading order term in the asymptotic expansion of the initial condition  $z_I = z_{I,0} + \varepsilon z_{I,0} + \dots$  as the best approximation of  $z_I$  in  $L^2$  among the straight fibres (3.5), that is

$$z_{I,0} = \begin{pmatrix} 0 \\ y_{I,0} \end{pmatrix} + \begin{pmatrix} \sin(\theta_I/2) \\ \cos(\theta_I/2) \end{pmatrix} (s - m_{I,0}),\quad (\text{B.20})$$

where

$$(m_{I,0}, y_{I,0}, \theta_I) = \operatorname{argmin}_{\bar{m}, \bar{y}, \bar{\theta}} \int_0^1 (z_{I,0} - z_I)^2 \, ds.\quad (\text{B.21})$$

452 Since we focus on pairs of initially straight fibres in this study, we set  $z_I = z_{I,0}$ .

A similar approach is available to determine  $z_I^J$ . Using the ansatz (3.7), we have

$$z_{I,1} = \begin{pmatrix} 0 \\ y_{I,1}(t) \end{pmatrix} - z'_{I,0}(t)m_{I,1} + z'^{\perp}_{I,0} \left( A_I(s - m_{I,0}) + \int_{m_{I,0}}^s \tilde{h}'(t, s) ds \right), \quad (\text{B.22})$$

where

$$(m_{I,1}, y_{I,1}, A_I) = \operatorname{argmin}_{\bar{m}, \bar{y}, \bar{\theta}} \int_0^1 (z_{I,0} + \varepsilon z_{I,1} - z_I)^2 ds. \quad (\text{B.23})$$

In the case where  $z_{I,0} = z_I$  the term  $z_{I,1}$  is minimal in  $L^2$ . Then, the degrees of freedom  $m_{I,1}$ ,  $y_{I,1}$ , and  $A_I$  can be computed using

$$0 = \int_0^1 z_{I,1} \cdot \delta z_{I,1} ds, \quad \text{where} \quad \delta z_{I,1} = \begin{pmatrix} 0 \\ \delta y_1 \end{pmatrix} - z'_{I,0} \delta m_1 + z'^{\perp}_{I,0} (s - m_{I,0}) \delta A. \quad (\text{B.24})$$

When we set  $\delta y_1 = y_0$ ,  $\delta m_1 = \int_0^1 (m_0 - s) ds$ , and  $\delta A = 0$ , we find that

$$0 = \int_0^1 z_{I,1} \cdot \left[ \begin{pmatrix} 0 \\ y_{I,0} \end{pmatrix} + z'_{I,0}(s - m_{I,0}) \right] = \int_0^1 z_{I,1} \cdot z_{I,0} ds. \quad (\text{B.25})$$

453 It therefore holds that  $J_1(0) = 0$ .

To complete the derivation, we use the ansatz (3.7) with degrees of freedom  $A(t)$ ,  $y_1(t)$ , and  $m_1(t)$ . Its variation and time-derivative are given by

$$\delta z_1 = \begin{pmatrix} 0 \\ \delta y_1 \end{pmatrix} - z'_0 \delta m_1 + z'^{\perp}_0 (s - m_0) \delta A, \quad (\text{B.26a})$$

$$\begin{aligned} \partial_t z_1 = & \begin{pmatrix} 0 \\ \dot{y}_1(t) \end{pmatrix} + z'_0 \left[ -\dot{m}_1 + \frac{\dot{\theta}}{2} \left( A(t)(s - m_0) + \int_{m_0}^s \tilde{h}'(s, t) ds \right) \right] \\ & + z'^{\perp}_0 \left( \frac{\dot{\theta}}{2} m_1 + \dot{A}(t)(s - m_0) - A \dot{m}_0 + \int_{m_0}^s \partial_t \tilde{h}'(s, t) ds - \tilde{h}'(m_0, t) \dot{m}_0 \right), \end{aligned} \quad (\text{B.26b})$$

where  $\tilde{h}'(m_0, t)$  is given in (B.19). A system of differential equations for  $m_1$ ,  $A$  and  $y_1$  can then be found integrating (3.14a) against  $\delta z_1$ . Using computer algebra, we obtained the

system

$$\begin{aligned} \frac{dy_1}{dt} &= \frac{1}{960} \csc^4\left(\frac{\theta}{2}\right) \left( 960A \sin\left(\frac{\theta}{2}\right) (6\nu_0^2 \cos(\theta) + 6\nu_0^2 + 1) \right. \\ &\quad + \cos\left(\frac{\theta}{2}\right) (-8928\nu_0^7 + 9600\nu_0^5 - 720\nu_0^4 + 490\nu_0^3 + 2940\nu_0^2 + 3\nu_0(960m_1 - 17) + 240) \\ &\quad \left. - 3 \cos\left(\frac{3\theta}{2}\right) (864\nu_0^7 - 960\nu_0^5 - 240\nu_0^4 + 30\nu_0^3 + 980\nu_0^2 + 3\nu_0 + 960\nu_0 m_1 + 80) \right), \\ \frac{dm_1}{dt} &= -\frac{1}{960} \csc^4\left(\frac{\theta}{2}\right) \left( -5760A\nu_0^2 \sin(\theta) - 480A \sin(\theta) \right. \\ &\quad + 10 (576\nu_0^7 - 624\nu_0^5 - 20\nu_0^3 + 3\nu_0 + 48) \cos(\theta) + 4608\nu_0^7 - 5040\nu_0^5 - 200\nu_0^3 \\ &\quad \left. - 1440\nu_0^2 + 21\nu_0 + 3\nu_0 \cos(2\theta) (384\nu_0^6 - 400\nu_0^4 + 480\nu_0 + 480m_1 + 3) - 1440\nu_0 m_1 - 480 \right), \\ \frac{dA}{dt} &= -\frac{1}{160} \cot\left(\frac{\theta}{2}\right) \csc^2\left(\frac{\theta}{2}\right) \left( 4 (96\nu_0^5 - 120\nu_0^3 + 60\nu_0^2 + 245) \nu_0 \cos(\theta) \right. \\ &\quad \left. + 576\nu_0^6 - 880\nu_0^4 + 720\nu_0^3 - 300\nu_0^2 - 900\nu_0 - 15 \right). \end{aligned}$$

<sup>454</sup> These ODEs govern the solution for  $z_1$ , the first-order correction to the filament shape.
